# Supplementary material
Source: Research Square preprint supplement (doi:10.21203/rs.3.rs-8830939/v1)
Supplement: Supplementary file 1 [file 47cc2460e7498dff600b4584.docx]

Supplementary Material

***Seasonal Evaluation of Microbial Quality of Water Resources Feeding İğneada Floodplain Forests***

**Ahmet Burak Dumlu, Utku Güner**

**Trakya University, Faculty of Science, Department of Biology, Balkan Campus, 22030 Edirne, Türkiye**

APPENDIX 1. DATA REDUCTION USING PRINCIPAL COMPONENT ANALYSIS (PCA)

**a)** KMO and Bartlett's test results belonging to PCA

| KMO Test |  | ,615 |
| --- | --- | --- |
| Bartlett's Test | X2 | 322,496 |
|  | Sd. | 28 |
|  | p | ,000 |

**b)** Factors obtained as a result of PCA

| Factors | Core Values | | | Rotation Values | | |
| --- | --- | --- | --- | --- | --- | --- |
| Eigen | Announced % | Cumulative % | Eigen | Announced % | Cumulative % |
| 1 | 3,934 | 49,176 | 49,176 | 3,934 | 49,176 | 49,176 |
| 2 | 1,273 | 15,907 | 65,083 | 1,273 | 15,907 | 65,083 |

**c)** Distribution of the variables resulting from the rotation among the factors.

| **Variables** | **Factors** | |
| --- | --- | --- |
| **1** | **2** |
| Fecal Coliform | 934 |  |
| *Clostridium perfringens* (vegetative + spore) | ,832 |  |
| Enterococcus (Fecal Streptococcus) | 781 |  |
| *Clostridia* (vegetative + spore) |  | 877 |
| *Pseudomonas aerguniosa* |  | 443 |
| Total Coliform | 457 | 714 |
| Total number of colonies that reproduced at 37 ° C. | 497 | 658 |
| Total number of colonies that reproduced at 22 ° C. | ,603 | 455 |

## APPENDIX 2. REFERENCES USED IN EVALUATING THE ANALYSIS RESULTS.

**a)** The relevant section of Annex-5 Table 2 of the Surface Water Quality Regulation, titled "Quality Criteria of Inland Surface Water Resources According to Their Classification in Terms of General Chemical and Physicochemical Parameters," was used as a reference in evaluating the analysis results.

| **Water Quality Parameters** | **Water Quality Classes** (a) | | | |
| --- | --- | --- | --- | --- |
| **I (very good)** | **II (good)** | **III (middle)** | **IV (weak)** |
| Color (m -1 ) | RES 436 nm: ≤ 1.5  RES 525 nm: ≤ 1.2  RES 620 nm: ≤ 0.8 | RES 436 nm: 3  RES 525 nm: 2.4  RES 620 nm: 1.7 | RES 436 nm: 4.3  RES 525 nm: 3.7  RES 620 nm: 2.5 | RES 436 nm: > 4.3  RES 525 nm: > 3.7  RES 620 nm: > 2.5 |
| pH | 6-9 | 6-9 | 6-9 | 6-9 |
| Conductivity (µS/cm) | < 400 | 1000 | 3000 | > 3000 |
| Dissolved oxygen (mg/L) | > 8 | 6 | 3 | < 3 |
| (a) Water uses according to quality classes:  **Class I** - High-quality water (Class I water quality indicates "Very Good" water status);  1) Surface waters with high potential for being used as drinking water,  2) Water suitable for recreational purposes, including those requiring physical contact such as swimming.  3) Water suitable for trout production,  4) Water suitable for animal production and farm needs,  **Class II** - Slightly polluted water (Class II water quality indicates "good" water status);  1) Surface waters with the potential to be used as drinking water,  2) Water suitable for recreational use,  3) Water suitable for fish production other than trout,  4) Irrigation water, provided it meets the irrigation water quality criteria determined by the current legislation,  **Class III** - Contaminated water (Class III water quality indicates "moderate" water status);  Except for facilities requiring high-quality water such as food and textile industries, water suitable for use in aquaculture and industrial applications after appropriate treatment.  **Class IV** - Heavily polluted water (Class IV water quality indicates "Poor" water quality);  Surface waters that are of lower quality than the quality parameters given for class III and can only reach the higher quality class through improvement. | | | | |

**b)** The relevant part of Annex Table-1: Quality Criteria According to the Classes of Inland Water Resources, which was referenced in the evaluation of the analysis results, of the repealed Water Pollution Control Regulation (17.12.2022).

| **Water Quality Parameters** | **Water Quality Classes** | | | |
| --- | --- | --- | --- | --- |
| **I (very good)** | **II (good)** | **III (middle)** | **IV (weak)** |
| pH | 6.5-8.5 | 6.5-8.5 | 6.0-9.0 | 6.0-9.0 outside |
| Dissolved oxygen (mg O2/L) | 8 | 6 | 3 | <3 |
| Oxygen saturation (%) | 90 | 70 | 40 | < 40 |
| Total dissolved solids (mg/L) | 500 | 1500 | 5000 | > 5000 |
| Color (Pt-Co unit) | 5 | 50 | 300 | > 300 |
| Fecal coliform (EMS/100 mL) | 10 | 200 | 2000 | > 2000 |
| Total coliforms (EMS/100 mL) | 100 | 20000 | 100000 | > 100000 |

### APPENDIX 3. DETERMINATION OF SIMILARITIES AND DISTINCTIONS IN SAMPLES ACCORDING TO MICROBIOLOGICAL CULTURE ANALYSIS RESULTS.

**a)** According to the K-means clustering analysis results, the cluster separating characteristics of microbiological parameters

| **Analysis Result*** | **1st Group** | **2nd Group** | **3rd Group** | **4th Group** | **5th Group** |
| --- | --- | --- | --- | --- | --- |
| *Total Coliform* | 8.97390 | 2.23259 | -,14442 | 1.48683 | 2.63145 |
| *Fecal Coliform* | 11.24818 | 1.50766 | -,14133 | 1.36615 | 1.14210 |
| *Enterococcus (Fecal Streptococcus)* | 1.18792 | 3.40663 | -,17860 | 4.77114 | 78855 |
| *Clostridium perfringens (vegetative + spore)* | 4.30903 | 9.33717 | -,15932 | 1.82803 | 86872 |
| *Clostridia (vegetative + spore)* | 1.97735 | 23419 | -,01733 | 03704 | ,01422 |
| *Pseudomonas aerguniosa* | -,13638 | 05653 | -,10188 | 64975 | 11.43849 |
| *Total number of colonies that reproduced at 37 ° C.* | 10.30935 | 60958 | -,13023 | 86386 | 3.46707 |
| *Total number of colonies that reproduced at 22 ° C.* | 11.02231 | ,56664 | -,11604 | ,59754 | 1.91903 |
| *Based on the Z value | | | | | |

**b)** Average colony bacteria data per 100 ml for each cluster, according to the K-means clustering analysis results.

| ***Cluster*** | ***T. Coliform*** | ***F. Coliform*** | ***Enterococcus*** | ***C. perfringens (v+s)*** | ***Clostridia (v+s)*** | ***P. aerguniosa*** | ***37 ° C UKS*** | ***22 ° C UKS*** |
| --- | --- | --- | --- | --- | --- | --- | --- | --- |
| **1** | 168000 | 97000 | 720 | 350 | 5880 | 0 | 116500 | 278000 |
| **2** | 48000 | 14400 | 1720 | 730 | 1680 | 10 | 10320 | 22560 |
| **3** | 5687.58 | 416.48 | 104.09 | 12.31 | 1074 | 1.79 | 2221.57 | 5881.55 |
| **4** | 34725 | 13200 | 2335 | 162.50 | 1205 | 40.75 | 13103.50 | 23315 |
| **5** | 55100 | 11300 | 540 | 90 | 1150 | 600 | 41600 | 55600 |
| ***Total*** | 8258.32 | 1614.99 | 184.59 | 24.35 | 1115.75 | 7.07 | 3647.15 | 8716.62 |

### APPENDIX 4. STATISTICAL EVALUATION OF THE RELATIONSHIP BETWEEN MICROBIOLOGICAL CULTURE AND PHYSICOCHEMICAL ANALYSIS RESULTS

| **Parameter** |  | **Water Temperature ( ° C)** | **pH** | **ORP** | **LDO (mg/l)** | **LDO(%)** | **Conductivity** | **Total Dissolved Solids** | **Total Alkalinity** | **Blur** | **Color (Pt-Co)** | **Color (436 nm)** | **Color (525 nm)** | **Color (620 nm)** |
| --- | --- | --- | --- | --- | --- | --- | --- | --- | --- | --- | --- | --- | --- | --- |
| ***Total Coliform*** | **p** | **,502** | 206 | ,084 | **-,341** | -,098 | 255 | 255 | 247 | -,122 | -,007 | ,026 | -,036 | -,139 |
| **r** | **,000** | ,013 | 317 | **,000** | 243 | ,002 | ,002 | ,003 | 145 | 937 | 754 | 667 | ,096 |
| ***Fecal Coliform*** | **p** | 292 | -,067 | ,095 | -,196 | -,074 | 135 | 135 | 207 | 289 | 250 | 274 | 263 | 264 |
| **r** | ,000 | ,425 | 256 | ,019 | 379 | 106 | 106 | ,013 | ,000 | ,003 | ,001 | ,001 | ,001 |
| ***Enterococcus (Fecal Streptococcus)*** | **p** | **426** | -,064 | 158 | **-,423** | -,220 | 161 | 161 | 219 | 125 | ,095 | 114 | ,091 | ,062 |
| **r** | **,000** | 449 | ,059 | **,000** | ,008 | ,054 | ,054 | ,008 | 135 | 255 | 175 | 279 | 459 |
| ***Clostridium perfringens (vegetative + spore)*** | **p** | 305 | -,026 | ,048 | -,128 | ,041 | 158 | 158 | 158 | 200 | 150 | 209 | 176 | 161 |
| **r** | ,000 | 754 | 566 | 128 | 630 | ,058 | ,059 | ,058 | ,016 | ,074 | ,012 | ,035 | ,054 |
| ***Clostridia (spores)*** | **p** | **441** | ,099 | ,085 | -,215 | -,041 | **413** | **413** | 271 | 266 | **355** | **447** | **364** | 279 |
| **r** | **,000** | 237 | 311 | ,010 | 622 | **,000** | **,000** | ,001 | ,001 | **,000** | **,000** | **,000** | ,001 |
| ***Clostridia (vegetative + spore)*** | **p** | **580** | 227 | -,144 | **-,347** | -,095 | **619** | **619** | **538** | **394** | **432** | **478** | **412** | **364** |
| **r** | **,000** | ,006 | ,085 | **,000** | 256 | **,000** | **,000** | **,000** | **,000** | **,000** | **,000** | **,000** | **,000** |
| ***Pseudomonas aerguniosa*** | **p** | ,051 | -,113 | 248 | -,039 | -,032 | ,025 | ,026 | -,064 | -,049 | -,028 | ,011 | ,020 | -,097 |
| **r** | ,540 | 177 | ,003 | 642 | 701 | 768 | 761 | 447 | 562 | 737 | ,899 | ,814 | 246 |
| ***Total number of colonies that reproduced at 37 ° C.*** | **p** | **,515** | 252 | -,034 | **-,463** | -,204 | 319 | 319 | 357 | ,011 | ,057 | ,085 | ,052 | ,000 |
| **r** | **,000** | ,002 | 687 | **,000** | ,014 | ,000 | ,000 | ,000 | 897 | 497 | 311 | 536 | ,997 |
| ***Total number of colonies that reproduced at 22 ° C.*** | **p** | 273 | ,051 | 117 | **-,333** | -,187 | ,046 | ,046 | ,063 | ,055 | 130 | 102 | ,053 | ,044 |
| **r** | ,001 | ,540 | 164 | **,000** | ,025 | 583 | 585 | 455 | ,513 | 121 | 224 | ,528 | ,603 |
| ***Fecal Group*** | **p** | **358** | -,073 | ,111 | -,283 | -,118 | 144 | 144 | 216 | 241 | 225 | 239 | 225 | 221 |
| **r** | **,000** | 382 | 186 | ,001 | 157 | ,084 | ,085 | ,009 | ,004 | ,007 | ,004 | ,007 | ,008 |
| ***Non-Fecal Group*** | **p** | **578** | 227 | -,144 | **-,346** | -,096 | **618** | **618** | **538** | **395** | **432** | **479** | **412** | **364** |
| **r** | **,000** | ,006 | ,085 | **,000** | 250 | **,000** | **,000** | **,000** | **,000** | **,000** | **,000** | **,000** | **,000** |
| **Spearman Rank Correlation Analysis, n=144** | | | | | | | | | | | | | | |

### APPENDIX 5. STATISTICAL EVALUATION OF THE RELATIONSHIP BETWEEN qPCR ANALYSIS RESULTS AND MICROBIOLOGICAL CULTURE ANALYSIS RESULTS

**a)** Data from Spearman rank correlation analysis performed between qPCR and microbiological culture analysis results.

| **Microbiological Analysis Parameter** | **BacUni** | **HF183** | **Bachum** | **BacCow** | **BacR** |
| --- | --- | --- | --- | --- | --- |
| **r*** | **r*** | **r*** | **r*** | **r*** |
| *Total Coliform* | **,862** | 692 | 718 | 735 | 730 |
| *Fecal Coliform* | 698 | **861** | **,843** | ,705 | 712 |
| *Enterococcus (Fecal Streptococcus)* | 710 | 731 | 728 | 684 | 688 |
| *Clostridia (vegetative + spore)* | 649 | 748 | 748 | 670 | 681 |
| *Clostridia (spores)* | 578 | 645 | 635 | ,506 | ,521 |
| *Clostridium perfringens (vegetative + spore)* | 574 | 610 | ,599 | ,543 | 561 |
| *Pseudomonas aeruginosa* | 343 | 312 | 312 | 358 | 377 |
| *Total number of colonies that reproduced at 37 ° C.* | **,816** | ,732 | 729 | 673 | 672 |
| *Total number of colonies that reproduced at 22 ° C.* | 678 | 596 | ,602 | 583 | 605 |
| ***Fecal Group*** | 737 | **,864** | **,851** | ,724 | ,732 |
| ***Non-Fecal Group*** | 579 | 647 | 637 | ,508 | ,523 |
| **n=144, p<0.001 for all parameters* | | | | | |

## APPENDIX-6. EVALUATION OF CLIMATIC ELEMENT DATA FOR THE IĞNEADA LONGOZ FORESTS RESEARCH AREA IN 2021-2022

**a)** Average monthly temperature ( ° C) and total rainfall (mm) data for the research area for the years 2021-2022.

| **Month** | **2021** | | **2022** | |
| --- | --- | --- | --- | --- |
| **Average Temperature ( ° C)** | **Total Rainfall (mm)** | **Average Temperature ( ° C)** | **Total Rainfall (mm)** |
| *Fireplace* | 5.9 | 241.7 | 3 | 85.3 |
| *February* | 6.4 | 106.6 | 5.7 | 168.5 |
| *March* | 5.9 | 65.6 | 3.6 | 19.6 |
| *April* | 10 | 102 | 12.3 | 92.9 |
| *May* | 17.4 | 50.8 | 16.2 | 24.7 |
| *June* | 19.8 | 75.1 | 20.4 | 114.2 |
| *July* | 24.4 | 3.7 | 22.3 | 2 |
| *August* | 24 | 7.1 | 23.5 | 68.2 |
| *September* | 18.2 | 17.4 | 19.1 | 15.6 |
| *October* | 12.1 | 115.4 | 14.5 | 20.8 |
| *November* | 11 | 85.3 | 11.8 | 137.9 |
| *December* | 6.5 | 217 | 8.2 | 166.8 |

### APPENDIX 9. STATISTICAL EVALUATION OF THE RELATIONSHIP BETWEEN CLIMATIC ELEMENT DATA AND MICROBIOLOGICAL CULTURE ANALYSIS RESULTS OF THE STATIONS.

**a)** Data from the Spearman rank correlation analysis performed between climate data and microbiological culture analysis results.

| ***Parameter*** | ***Statistical Coefficient*** | ***Average Temperature ( ° C)*** | ***Total Rainfall (mm)*** | ***Water Level (Qualitative)*** |
| --- | --- | --- | --- | --- |
| *Water Level (Qualitative)* | r | **-,719** | 387 | 1,000 |
| p | **,000** | ,000 | . |
| *Total Coliform* | r | 419 | -,372 | -,360 |
| p | ,000 | ,000 | ,000 |
| *Fecal Coliform* | r | 286 | -,232 | -,170 |
| p | ,001 | ,005 | ,042 |
| *Enterococcus (Fecal Streptococcus)* | r | 490 | -,444 | -,398 |
| p | ,000 | ,000 | ,000 |
| *Clostridium perfringens (vegetative + spore)* | r | 186 | -,164 | -,150 |
| p | ,026 | ,050 | ,073 |
| *Clostridia (spores)* | r | 332 | -,386 | -,138 |
| p | ,000 | ,000 | ,099 |
| *Clostridia (vegetative + spore)* | r | **611** | **-,506** | -,355 |
| p | **,000** | **,000** | ,000 |
| *Pseudomonas aerguniosa* | r | ,096 | -,203 | -,098 |
| p | 253 | ,015 | 241 |
| *Total number of colonies that reproduced at 37 ° C.* | r | **637** | -,494 | -,488 |
| p | **,000** | ,000 | ,000 |
| *Total number of colonies that reproduced at 22 ° C.* | r | 403 | -,291 | -,420 |
| p | ,000 | ,000 | ,000 |
| *Fecal Group* | r | 380 | -,311 | -,289 |
| p | ,000 | ,000 | ,000 |
| *Non-Fecal Group* | r | **612** | **-,505** | -,355 |
| p | **,000** | **,000** | ,000 |
| *For all analyses, n=144* | | | | |

### APPENDIX-10. STATISTICAL EVALUATION OF THE DISTRIBUTION OF MICROBIAL CULTURE AND PHYSICOCHEMICAL ANALYSIS RESULTS OF THE STATIONS ACCORDING TO SEASONS.

**a)** Kruskal-Wallis test table showing the seasonal distribution of microbiological culture and physicochemical parameter analysis results for the stations.

| ***Parameter*** | ***General***  ***Score (p)*** | ***Winter-Autumn (p)*** | ***Winter-Spring (p)*** | ***Winter-Summer (p)*** | ***Autumn-Spring (p)*** | ***Autumn-Summer (p)*** | ***Spring-Summer (p)*** |
| --- | --- | --- | --- | --- | --- | --- | --- |
| *Total Coliform* | **<0.001** | 0.414 | **<0.001** | **<0.001** | **0.009** | **<0.001** | 1,000 |
| *Fecal Coliform* | **0.001** | 1,000 | 0.292 | **0.001** | 1,000 | **0.042** | 0.334 |
| *Enterococcus (Fecal Streptococcus)* | **<0.001** | 0.204 | **0.025** | **<0.001** | 1,000 | **<0.001** | **0.008** |
| *Clostridium perfringens (vegetative + spore)* | **0.009** | 1,000 | 0.118 | **0.024** | 0.436 | 0.115 | 1,000 |
| *Clostridia (spores)* | **<0.001** | 0.627 | **0.002** | **<0.001** | 0.292 | **0.011** | 1,000 |
| *Clostridia (vegetative + spore)* | **<0.001** | **<0.001** | **0.018** | **<0.001** | 1,000 | **0.009** | **<0.001** |
| *Pseudomonas aerguniosa* | 0.478 | - | - | - | - | - | - |
| *Total number of colonies that reproduced at 37 ° C.* | **<0.001** | **<0.001** | **<0.001** | **<0.001** | 1,000 | 0.12 | **0.003** |
| *Total number of colonies that reproduced at 22 ° C.* | **<0.001** | 0.431 | 0.389 | **<0.001** | 1,000 | **0.025** | **0.029** |
| *Fecal Group* | **<0.001** | 0.748 | 0.174 | **<0.001** | 1,000 | **0.005** | **0.04** |
| *Non-Fecal Group* | **<0.001** | **0.019** | **<0.001** | **<0.001** | 1,000 | **<0.001** | **0.009** |
| *pH* | **<0.001** | **<0.001** | **<0.001** | **<0.001** | **0.04** | **0.015** | 1,000 |
| *ORP* | **0.003** | **0.003** | 1,000 | 1,000 | **0.018** | 0.095 | 1,000 |
| *LDO (mg/l)* | **<0.001** | **<0.001** | **0.019** | **<0.001** | 0.879 | **0.005** | **<0.001** |
| *LDO %* | **<0.001** | 0.235 | 0.45 | **0.002** | **0.001** | 0.721 | **<0.001** |
| *Conductivity* | **<0.001** | **<0.001** | **0.004** | **<0.001** | 1,000 | 1,000 | 0.653 |
| *Total Dissolved Solids* | **<0.001** | **<0.001** | **0.004** | **<0.001** | 1,000 | 1,000 | 0.657 |
| *Total Alkalinity* | **<0.001** | **<0.001** | **0.003** | **<0.001** | **0.001** | 1,000 | 0.107 |
| *Blur* | **<0.001** | 1,000 | **<0.001** | 1,000 | **0.001** | 1,000 | **0.008** |
| *Color (Pt-Co)* | 0.12 | - | - | - | - | - | - |
| *Color (436 nm)* | 0.387 | - | - | - | - | - | - |
| *Color (525 nm)* | 0.184 | - | - | - | - | - | - |
| *Color (620 nm)* | 0.078 | - | - | - | - | - | - |
| *For all analyses, n=144* | | | | | | | |

# APPENDIX-11: Physicochemical Analysis Results and Climatic/Geographical Parameter Data of Lake Saka (1S)

| **PHYSICAL CHEMICAL ANALYSIS RESULTS** | | | | | | | | |
| --- | --- | --- | --- | --- | --- | --- | --- | --- |
| **Year** | **2021** | | | | **2022** | | | |
| **Season** | **Winter** | **Spring** | **Summer** | **Autumn** | **Winter** | **Spring** | **Summer** | **Autumn** |
| **Water Temperature ( ° C)** | 7 | 23 | 24.9 | 10.6 | 8.8 | 21.8 | 25.9 | 12.2 |
| **pH** | 7.52 | 8.35 | 8.53 | 8.38 | 7.22 | 8.01 | 8.65 | 8.42 |
| **ORP** | -42.4 | -63.3 | -72.7 | -61.9 | -37.4 | -45.2 | -82.9 | -63.8 |
| **LDO (mg/l)** | 8.01 | 13.52 | 4.75 | 3.61 | 8.33 | 11.9 | 7.88 | 7.74 |
| **LDO %** | 68.7 | 158.1 | 56 | 32.1 | 77.2 | 110 | 82.1 | 79.4 |
| **EC ( µ s/cm)** | 166.7 | 221 | 325 | 617 | 338.1 | 334.2 | 465 | 516.2 |
| **TDS (ppm)** | 107.0 | 141.4 | 208.0 | 394.9 | 216.4 | 213.9 | 297.6 | 330.4 |
| **Total Alkalinity  (mg/l CaCO 3 )** | 50 | 81 | 91 | 131 | 56 | 64 | 112 | 139 |
| **Blur (ntu)** | 4.91 | 1.42 | 3.43 | 4.28 | 1.88 | 1.34 | 2.99 | 3.22 |
| **Color (Pt-Co)  465 nm** | 69 | 73 | 56 | 55 | 14 | 66 | 58 | 54 |
| **Color ( m⁻¹ )  436 nm** | 1.88 | 2.64 | 2.16 | 2.08 | 0.8 | 1.72 | 2.24 | 2.04 |
| **Color ( m⁻¹ )  525 nm** | 0.8 | 0.92 | 0.64 | 0.72 | 0.48 | 0.92 | 0.96 | 1 |
| **Color (m⁻¹ ) 620  nm** | 0.48 | 0.44 | 0.16 | 0.24 | 0.4 | 0.48 | 0.52 | 0.48 |
| ***Colorizations are based on Annex-5 Table 2 of the Surface Water Quality Regulation and the repealed (17.12.2022) Water Pollution Control Regulation Table-1: Quality Criteria According to the Classes of Inland Water Resources. Accordingly:** | | | | | | | | |
| **Water Quality Classes** |  | **I (Very good)** |  | **II (Good)** |  | **III (middle)** |  | **IV (Weak)** |
| **CLIMATIC/GEOGRAPHIC PARAMETER DATA** | | | | | | | | |
| **Year** | **2021** | | | | **2022** | | | |
| **Season** | **Winter** | **Spring** | **Summer** | **Autumn** | **Winter** | **Spring** | **Summer** | **Autumn** |
| **Current Air  Temperature ( ° C)** | 12 | 23.6 | 25.7 | 12.6 | 11.9 | 22.9 | 27.2 | 14.8 |
| **Wind** | 15 | 22 | 22 | 12 | 18 | 24 | 18 | 22 |
| **Water Level (Qualitative)**** | 4 | 3 | 2 | 2 | 4 | 4 | 2 | 4 |
| **Elevation** | 0 meters | | | | | | | |
| ****Water level was evaluated on a scale of 1 to 5.**** | | | | | | | | |

# APPENDIX-12: Microbiological Culture and Molecular Analysis Results of Saka Lake (1S)

| **MICROBIOLOGICAL CULTURE ANALYSIS RESULTS*** | | | | | | | | |
| --- | --- | --- | --- | --- | --- | --- | --- | --- |
| **Year** | **2021** | | | | **2022** | | | |
| **Season** | **Winter** | **Spring** | **Summer** | **Autumn** | **Winter** | **Spring** | **Summer** | **Autumn** |
| **Total Coliform  (cfu/100ml)** | 810 | 7200 | 10600 | 690 | 535 | 5400 | 7100 | 740 |
| **Fecal Coliform  (cfu/100ml)** | 220 | 80 | 115 | 12 | 116 | 92 | 210 | 125 |
| **Fecal Streptococcus (Enterococcus)  (cfu/100ml)** | 10 | 15 | 180 | 6 | 24 | 8 | 75 | 16 |
| ***Clostridium perfringens* (Vegetative+Sport)  (cfu/100ml)** | 0 | 0 | 22 | 0 | 0 | 0 | 0 | 0 |
| ***Clostridia* (Spores Only)  (cfu/100ml)** | 14 | 38 | 650 | 35 | 13 | 74 | 112 | 27 |
| ***Clostridia* (Vegetative+Sport)  (cfu/100ml)** | 84 | 108 | 7500 | 510 | 77 | 122 | 3280 | 860 |
| ***Pseudomonas aeruginosa*  (cfu/100ml)** | 0 | 0 | 0 | 0 | 0 | 0 | 0 | 0 |
| **36 ° C Total Germ Count  (cfu/1ml)** | 352 | 300 | 16880 | 820 | 194 | 565 | 8810 | 770 |
| **22 ° C Total Germ Count  (cfu/1ml)** | 3060 | 1100 | 17520 | 1520 | 1164 | 1420 | 14770 | 1250 |
| ***Colorizations are based on Annex-5 Table 2 of the Surface Water Quality Regulation and the repealed (17.12.2022) Water Pollution Control Regulation Table-1: Quality Criteria According to the Classes of Inland Water Resources. Accordingly:** | | | | | | | | |
| **Water Quality Classes** |  | **I (Very good)** |  | **II (Good)** |  | **III (middle)** |  | **IV (Weak)** |
| **MOLECULAR ANALYSIS RESULTS** | | | | | | | | |
| **Year** | **2021** | | | | **2022** | | | |
| **Season** | **Winter** | **Spring** | **Summer** | **Autumn** | **Winter** | **Spring** | **Summer** | **Autumn** |
| **BacUni  (log10 gc/100ml)** | 4.40 | 5.57 | 5.79 | 4.51 | 4.28 | 5.46 | 5.64 | 4.67 |
| **HF183  (log10 gc/100ml)** | 3.38 | 3.23 | 4.30 | 2.48 | 3.04 | 3.34 | 4.23 | 3.15 |
| **Bachum  (log10 gc/100ml)** | 3.30 | 3.18 | 4.15 | 2.70 | 3.51 | 3.18 | 4.18 | 2.89 |
| **BacCow  (log10 gc/100ml)** | 3.28 | 3.15 | 4.60 | 2.60 | 2.86 | 3.52 | 4.08 | 2.75 |
| **BacR  (log10 gc/100ml)** | 3.23 | 3.00 | 4.38 | 2.30 | 2.82 | 3.08 | 4.00 | 2.72 |
| **LOD: Limit of Detection** | | | | | | | | |

# APPENDIX-13: Physicochemical Analysis Results and Climatic/Geographical Parameter Data for Yavuz Creek – Within the National Park (2Y)

| **PHYSICAL-CHEMICAL ANALYSIS RESULTS*** | | | | | | | | |
| --- | --- | --- | --- | --- | --- | --- | --- | --- |
| **Year** | **2021** | | | | **2022** | | | |
| **Season** | **Winter** | **Spring** | **Summer** | **Autumn** | **Winter** | **Spring** | **Summer** | **Autumn** |
| **Water Temperature ( ° C)** | 7.4 | 21.7 | 18.5 | 10.8 | 9.1 | 20.4 | 23.7 | 12.6 |
| **pH** | 7.9 | 8.43 | 7.83 | 8.51 | 7.35 | 7.8 | 7.57 | 7.93 |
| **ORP** | -63 | -67.3 | -39.3 | -68.5 | -44.2 | -37.7 | -49 | -51.5 |
| **LDO (mg/l)** | 12.09 | 9.96 | 3.07 | 10.16 | 12.2 | 9.01 | 5.74 | 9.77 |
| **LDO %** | 99.9 | 114.4 | 34.1 | 91.7 | 101.6 | 101.1 | 68.5 | 99.5 |
| **EC ( µ s/cm)** | 147.5 | 233 | 474 | 301 | 193 | 226 | 266 | 284 |
| **TDS (ppm)** | 94.4 | 149.1 | 303.4 | 192.6 | 123.5 | 144.64 | 170.2 | 181.76 |
| **Total Alkalinity  (mg/l CaCO 3 )** | 53 | 84 | 202.5 | 154 | 73 | 91 | 124.5 | 177 |
| **Blur (ntu)** | 1.44 | 1.04 | 3.06 | 3.36 | 0.82 | 1.1 | 9.47 | 5.1 |
| **Color (Pt-Co)  465 nm** | 22 | 15 | 34 | 14 | 0 | 7 | 25 | 19 |
| **Color ( m⁻¹ )  436 nm** | 0.4 | 0.56 | 1.16 | 0.56 | 0.12 | 0.16 | 0.48 | 0.64 |
| **Color ( m⁻¹ )  525 nm** | 0.16 | 0.2 | 0.36 | 0.24 | 0.12 | 0.12 | 0.28 | 0.36 |
| **Color (m⁻¹ ) 620  nm** | 0.08 | 0.12 | 0.12 | 0.04 | 0 | 0 | 0.16 | 0.24 |
| ***Colorizations are based on Annex-5 Table 2 of the Surface Water Quality Regulation and the repealed (17.12.2022) Water Pollution Control Regulation Table-1: Quality Criteria According to the Classes of Inland Water Resources. Accordingly:** | | | | | | | | |
| **Water Quality Classes** |  | **I (Very good)** |  | **II (Good)** |  | **III (middle)** |  | **IV (Weak)** |
| **CLIMATIC/GEOGRAPHIC PARAMETER DATA** | | | | | | | | |
| **Year** | **2021** | | | | **2022** | | | |
| **Season** | **Winter** | **Spring** | **Summer** | **Autumn** | **Winter** | **Spring** | **Summer** | **Autumn** |
| **Current Air  Temperature ( ° C)** | 9 | 24 | 26.6 | 13.1 | 13.4 | 22.3 | 28.5 | 14.5 |
| **Wind** | 5 | 8 | 10 | 4 | 10 | 4 | 15 | 6 |
| **Water Level (Qualitative)**** | 3 | 2 | 1 | 2 | 4 | 3 | 2 | 1 |
| **Elevation** | 19 meters | | | | | | | |
| ****Water level was evaluated on a scale of 1 to 5.**** | | | | | | | | |

# APPENDIX-14: Microbiological Culture and Molecular Analysis Results of Yavuz Creek – Within the National Park (2Y)

| **MICROBIOLOGICAL CULTURE ANALYSIS RESULTS*** | | | | | | | | |
| --- | --- | --- | --- | --- | --- | --- | --- | --- |
| **Year** | **2021** | | | | **2022** | | | |
| **Season** | **Winter** | **Spring** | **Summer** | **Autumn** | **Winter** | **Spring** | **Summer** | **Autumn** |
| **Total Coliform  (CFU/100ml)** | 322 | 10120 | 32500 | 3440 | 137 | 5750 | 2920 | 2250 |
| **Fecal Coliform  (CFU/100ml)** | 58 | 680 | 640 | 240 | 7 | 440 | 330 | 220 |
| **Fecal Streptococcus (Enterococcus)  (cfu/100ml)** | 4 | 88 | 580 | 20 | 2 | 114 | 110 | 56 |
| ***Clostridium perfringens* (Vegetative+Sport)  (cfu/100ml)** | 0 | 74 | 16 | 6 | 0 | 44 | 11 | 4 |
| ***Clostridia* (Spores Only)  (cfu/100ml)** | 2 | 16 | 2500 | 10 | 3 | 26 | 62 | 14 |
| ***Clostridia* (Vegetative+Sport)  (cfu/100ml)** | 12 | 41 | 3300 | 40 | 24 | 63 | 540 | 71 |
| ***Pseudomonas aeruginosa*  (cfu/100ml)** | 0 | 0 | 1 | 0 | 0 | 1 | 0 | 0 |
| **36 ° C Total Germ Count  (kfu/1ml)** | 103 | 2580 | 3840 | 1820 | 63 | 1430 | 5040 | 1540 |
| **22 ° C Total Germ Count  (kfu/1ml)** | 2480 | 4840 | 4920 | 5960 | 454 | 4210 | 11440 | 6220 |
| ***Colorizations are based on Annex-5 Table 2 of the Surface Water Quality Regulation and the repealed (17.12.2022) Water Pollution Control Regulation Table-1: Quality Criteria According to the Classes of Inland Water Resources. Accordingly:** | | | | | | | | |
| **Water Quality Classes** |  | **I (Very good)** |  | **II (Good)** |  | **III (middle)** |  | **IV (Weak)** |
| **MOLECULAR ANALYSIS RESULTS** | | | | | | | | |
| **Year** | **2021** | | | | **2022** | | | |
| **Season** | **Winter** | **Spring** | **Summer** | **Autumn** | **Winter** | **Spring** | **Summer** | **Autumn** |
| **BacUni  (log10 gks/100ml)** | 3.83 | 5.96 | 6.46 | 5.32 | 3.51 | 5.93 | 5.54 | 5.20 |
| **HF183  (log10 gks/100ml)** | 2.81 | 4.15 | 4.30 | 4.08 | 2.04 | 3.92 | 4.38 | 3.76 |
| **Bachum  (log10 gks/100ml)** | 2.79 | 4.08 | 4.18 | 3.89 | LOD | 3.80 | 4.34 | 3.81 |
| **BacCow  (log10 gks/100ml)** | 2.84 | 4.64 | 4.76 | 4.57 | 2.63 | 4.08 | 4.11 | 4.15 |
| **BacR  (log10 gks/100ml)** | 2.93 | 4.45 | 4.57 | 4.34 | LOD | 3.72 | 4.18 | 3.79 |
| **LOD: Below Detection Limit** | | | | | | | | |

# APPENDIX-15: Physicochemical Analysis Results and Climatic/Geographical Parameter Data for Yavuz Creek – National Park Entrance (3Y)

| **PHYSICAL-CHEMICAL ANALYSIS RESULTS*** | | | | | | | | |
| --- | --- | --- | --- | --- | --- | --- | --- | --- |
| **Year** | **2021** | | | | **2022** | | | |
| **Season** | **Winter** | **Spring** | **Summer** | **Autumn** | **Winter** | **Spring** | **Summer** | **Autumn** |
| **Water Temperature ( ° C)** | 7 | 20.4 | 21.5 | 11.5 | 8.2 | 19.9 | 29.2 | 13.1 |
| **pH** | 8.3 | 8.25 | 7.87 | 8.39 | 7.27 | 7.77 | 7.44 | 7.98 |
| **ORP** | -84.5 | -57.8 | -39 | -62.7 | -39.5 | -34.3 | -41.3 | -50.8 |
| **LDO (mg/l)** | 12.33 | 10.02 | 5.7 | 8.53 | 11.99 | 10.04 | 5.83 | 9.45 |
| **LDO %** | 99.1 | 110.2 | 64 | 77.2 | 99.3 | 102 | 70.6 | 99.5 |
| **EC ( µ s/cm)** | 145.6 | 232 | 320 | 302 | 193.3 | 244 | 272 | 256 |
| **TDS (ppm)** | 93.2 | 148.5 | 204.8 | 193.3 | 123.7 | 156.16 | 174.1 | 163.84 |
| **Total Alkalinity  (mg/l CaCO 3 )** | 53 | 84 | 119.5 | 134.5 | 68 | 87.5 | 123 | 125 |
| **Blur (ntu)** | 1.69 | 0.93 | 1.69 | 1.68 | 1.11 | 1.21 | 3.84 | 2.01 |
| **Color (Pt-Co)  465 nm** | 16 | 8 | 48 | 17 | 4 | 7 | 27 | 15 |
| **Color ( m⁻¹ )  436 nm** | 0.4 | 0.36 | 0.88 | 0.68 | 0.08 | 0.16 | 0.52 | 0.56 |
| **Color ( m⁻¹ )  525 nm** | 0.16 | 0.12 | 0.56 | 0.56 | 0.04 | 0.12 | 0.32 | 0.48 |
| **Color (m⁻¹ ) 620  nm** | 0.08 | 0.04 | 0.04 | 0.36 | 0.04 | 0.04 | 0.28 | 0.2 |
| ***Colorizations are based on Annex-5 Table 2 of the Surface Water Quality Regulation and the repealed (17.12.2022) Water Pollution Control Regulation Table-1: Quality Criteria According to the Classes of Inland Water Resources. Accordingly:** | | | | | | | | |
| **Water Quality Classes** |  | **I (Very good)** |  | **II (Good)** |  | **III (middle)** |  | **IV (Weak)** |
| **CLIMATIC/GEOGRAPHIC PARAMETER DATA** | | | | | | | | |
| **Year** | **2021** | | | | **2022** | | | |
| **Season** | **Winter** | **Spring** | **Summer** | **Autumn** | **Winter** | **Spring** | **Summer** | **Autumn** |
| **Current Air  Temperature ( ° C)** | 7 | 24.9 | 27.9 | 11.6 | 13.9 | 22.1 | 29.2 | 14.9 |
| **Wind** | 3 | 12 | 12 | 4 | 7 | 5 | 13 | 5 |
| **Water Level (Qualitative)**** | 3 | 2 | 1 | 2 | 4 | 3 | 2 | 1 |
| **Elevation** | 23 meters | | | | | | | |
| ****Water level was evaluated on a scale of 1 to 5.**** | | | | | | | | |

# APPENDIX-16: Microbiological Culture and Molecular Analysis Results of Yavuz Creek – National Park Entrance (3Y)

| **MICROBIOLOGICAL CULTURE ANALYSIS RESULTS*** | | | | | | | | |
| --- | --- | --- | --- | --- | --- | --- | --- | --- |
| **Year** | **2021** | | | | **2022** | | | |
| **Season** | **Winter** | **Spring** | **Summer** | **Autumn** | **Winter** | **Spring** | **Summer** | **Autumn** |
| **Total Coliform  (cfu/100ml)** | 1220 | 9620 | 11490 | 4500 | 607 | 7450 | 6950 | 2850 |
| **Fecal Coliform  (cfu/100ml)** | 18 | 60 | 170 | 48 | 26 | 42 | 750 | 370 |
| **Fecal Streptococcus (Enterococcus)  (cfu/100ml)** | 2 | 40 | 88 | 4 | 0 | 22 | 35 | 44 |
| ***Clostridium perfringens* (Vegetative+Sport)  (cfu/100ml)** | 0 | 0 | 3 | 2 | 0 | 0 | 9 | 7 |
| ***Clostridia* (Spores Only)  (cfu/100ml)** | 2 | 16 | 72 | 5 | 6 | 25 | 6 | 11 |
| ***Clostridia* (Vegetative+Sport)  (cfu/100ml)** | 6 | 40 | 420 | 25 | 14 | 38 | 540 | 320 |
| ***Pseudomonas aeruginosa*  (cfu/100ml)** | 0 | 0 | 3 | 5 | 0 | 0 | 0 | 0 |
| **36 ° C Total Germ Count  (cfu/1ml)** | 79 | 1260 | 840 | 1170 | 74 | 895 | 9760 | 2510 |
| **22 ° C Total Germ Count  (cfu/1ml)** | 840 | 4040 | 6120 | 1620 | 486 | 3180 | 11360 | 4380 |
| ***Colorizations are based on Annex-5 Table 2 of the Surface Water Quality Regulation and the repealed (17.12.2022) Water Pollution Control Regulation Table-1: Quality Criteria According to the Classes of Inland Water Resources. Accordingly:** | | | | | | | | |
| **Water Quality Classes** |  | **I (Very good)** |  | **II (Good)** |  | **III (middle)** |  | **IV (Weak)** |
| **MOLECULAR ANALYSIS RESULTS** | | | | | | | | |
| **Year** | **2021** | | | | **2022** | | | |
| **Season** | **Winter** | **Spring** | **Summer** | **Autumn** | **Winter** | **Spring** | **Summer** | **Autumn** |
| **BacUni  (log10 gc/100ml)** | 4.28 | 5.89 | 5.75 | 5.30 | 4.08 | 5.91 | 5.83 | 5.61 |
| **HF183  (log10 gc/100ml)** | 3.18 | 3.84 | 4.11 | 3.45 | 3.04 | 3.75 | 4.49 | 4.08 |
| **Bachum  (log10 gc/100ml)** | 3.15 | 3.69 | 4.04 | 3.40 | LOD | 3.62 | 4.41 | 3.99 |
| **BacCow  (log10 gc/100ml)** | 3.11 | 3.60 | 3.80 | 3.34 | 2.80 | 3.52 | 3.86 | 3.20 |
| **BacR  (log10 gc/100ml)** | 3.08 | 3.28 | 3.89 | 3.28 | 2.38 | 3.43 | 3.73 | 3.36 |
| **LOD: Limit of Detection** | | | | | | | | |

# APPENDIX-17: Physicochemical Analysis Results and Climatic/Geographical Parameter Data of Yavuz Stream – Lower Branch (4Y)

| **PHYSICAL-CHEMICAL ANALYSIS RESULTS*** | | | | | | | | |
| --- | --- | --- | --- | --- | --- | --- | --- | --- |
| **Year** | **2021** | | | | **2022** | | | |
| **Season** | **Winter** | **Spring** | **Summer** | **Autumn** | **Winter** | **Spring** | **Summer** | **Autumn** |
| **Water Temperature ( ° C)** | 6.4 | 19.7 | 24.8 | 10.9 | 7.8 | 19.9 | 24.9 | 12.9 |
| **pH** | 7.57 | 8.02 | 7.8 | 8.38 | 7.23 | 7.5 | 7.44 | 7.71 |
| **ORP** | -45.3 | -46.4 | -36.1 | -62.4 | -37.4 | -41.8 | -41.2 | -45.3 |
| **LDO (mg/l)** | 12.42 | 9.2 | 2.44 | 9 | 11.66 | 10.04 | 5.86 | 9.89 |
| **LDO %** | 100 | 101.5 | 29.4 | 81.6 | 96.1 | 99.8 | 71.2 | 99.8 |
| **EC ( µ s/cm)** | 135.8 | 222 | 305 | 285 | 178.1 | 216 | 258 | 288 |
| **TDS (ppm)** | 86.9 | 142.1 | 195.2 | 182.4 | 114 | 138.24 | 165.1 | 184.32 |
| **Total Alkalinity  (mg/l CaCO 3 )** | 44.5 | 83 | 117.5 | 124.5 | 64 | 85 | 115.5 | 133.5 |
| **Blur (ntu)** | 1.39 | 0.67 | 0.81 | 1.21 | 1.71 | 0.81 | 3.01 | 1.93 |
| **Color (Pt-Co)  465 nm** | 17 | 5 | 11 | 4 | 0 | 8 | 11 | 8 |
| **Color ( m⁻¹ )  436 nm** | 0.52 | 0.2 | 0.24 | 0.16 | 0.16 | 0.24 | 0.16 | 0.2 |
| **Color ( m⁻¹ )  525 nm** | 0.32 | 0.04 | 0.12 | 0.16 | 0.08 | 0.16 | 0.12 | 0.12 |
| **Color (m⁻¹ ) 620  nm** | 0.28 | 0 | 0 | 0.08 | 0 | 0.04 | 0.12 | 0.08 |
| ***Colorizations are based on Annex-5 Table 2 of the Surface Water Quality Regulation and the repealed (17.12.2022) Water Pollution Control Regulation Table-1: Quality Criteria According to the Classes of Inland Water Resources. Accordingly:** | | | | | | | | |
| **Water Quality Classes** |  | **I (Very good)** |  | **II (Good)** |  | **III (middle)** |  | **IV (Weak)** |
| **CLIMATIC/GEOGRAPHIC PARAMETER DATA** | | | | | | | | |
| **Year** | **2021** | | | | **2022** | | | |
| **Season** | **Winter** | **Spring** | **Summer** | **Autumn** | **Winter** | **Spring** | **Summer** | **Autumn** |
| **Current Air  Temperature ( ° C)** | 7 | 24.3 | 29.8 | 11 | 13.9 | 22.2 | 27.5 | 14.7 |
| **Wind** | 3 | 12 | 12 | 5 | 8 | 8 | 14 | 8 |
| **Water Level (Qualitative)**** | 3 | 2 | 1 | 2 | 4 | 3 | 2 | 1 |
| **Elevation** | 30 meters | | | | | | | |
| ****Water level was evaluated on a scale of 1 to 5.**** | | | | | | | | |

# APPENDIX-18: Microbiological Culture and Molecular Analysis Results of Yavuz Creek – Lower Branch (4Y)

| **MICROBIOLOGICAL CULTURE ANALYSIS RESULTS*** | | | | | | | | |
| --- | --- | --- | --- | --- | --- | --- | --- | --- |
| **Year** | **2021** | | | | **2022** | | | |
| **Season** | **Winter** | **Spring** | **Summer** | **Autumn** | **Winter** | **Spring** | **Summer** | **Autumn** |
| **Total Coliform  (cfu/100ml)** | 766 | 4800 | 36250 | 6210 | 301 | 2400 | 1150 | 740 |
| **Fecal Coliform  (cfu/100ml)** | 66 | 22 | 62 | 21 | 17 | 28 | 170 | 94 |
| **Fecal Streptococcus (Enterococcus)  (cfu/100ml)** | 4 | 32 | 256 | 8 | 0 | 23 | 120 | 26 |
| ***Clostridium perfringens* (Vegetative+Sport)  (cfu/100ml)** | 1 | 0 | 2 | 0 | 0 | 0 | 5 | 1 |
| ***Clostridia* (Spores Only)  (cfu/100ml)** | 4 | 2 | 252 | 10 | 11 | 8 | 2 | 14 |
| ***Clostridia* (Vegetative+Sport)  (cfu/100ml)** | 10 | 30 | 920 | 30 | 19 | 16 | 315 | 286 |
| ***Pseudomonas aeruginosa*  (cfu/100ml)** | 0 | 0 | 0 | 0 | 0 | 0 | 0 | 0 |
| **36 ° C Total Germ Count  (cfu/1ml)** | 79 | 180 | 7400 | 1010 | 55 | 510 | 4880 | 850 |
| **22 ° C Total Germ Count  (cfu/1ml)** | 1920 | 6360 | 37800 | 1140 | 320 | 2960 | 5240 | 1370 |
| ***Colorizations are based on Annex-5 Table 2 of the Surface Water Quality Regulation and the repealed (17.12.2022) Water Pollution Control Regulation Table-1: Quality Criteria According to the Classes of Inland Water Resources. Accordingly:** | | | | | | | | |
| **Water Quality Classes** |  | **I (Very good)** |  | **II (Good)** |  | **III (middle)** |  | **IV (Weak)** |
| **MOLECULAR ANALYSIS RESULTS** | | | | | | | | |
| **Year** | **2021** | | | | **2022** | | | |
| **Season** | **Winter** | **Spring** | **Summer** | **Autumn** | **Winter** | **Spring** | **Summer** | **Autumn** |
| **BacUni  (log10 gc/100ml)** | 4.30 | 5.40 | 6.45 | 5.52 | 3.97 | 5.11 | 5.32 | 4.76 |
| **HF183  (log10 gc/100ml)** | 3.23 | 3.41 | 3.95 | 3.26 | 2.96 | 3.18 | 3.96 | 2.94 |
| **Bachum  (log10 gc/100ml)** | 3.26 | 3.36 | 4.04 | 3.34 | LOD | 3.41 | 3.82 | 2.53 |
| **BacCow  (log10 gc/100ml)** | 3.32 | 3.77 | 3.73 | 3.38 | 2.53 | 2.98 | 3.88 | 2.62 |
| **BacR  (log10 gc/100ml)** | 3.26 | 3.80 | 3.62 | 3.23 | LOD | 2.94 | 3.71 | 2.45 |
| **LOD: Limit of Detection** | | | | | | | | |

# APPENDIX-19: Physicochemical Analysis Results and Climatic/Geographical Parameter Data for Yavuz Stream – Upper Branch (5Y)

| **PHYSICAL-CHEMICAL ANALYSIS RESULTS*** | | | | | | | | |
| --- | --- | --- | --- | --- | --- | --- | --- | --- |
| **Year** | **2021** | | | | **2022** | | | |
| **Season** | **Winter** | **Spring** | **Summer** | **Autumn** | **Winter** | **Spring** | **Summer** | **Autumn** |
| **Water Temperature ( ° C)** | 6.9 | 19.5 | 22.8 | 8.5 | 7 | 20.1 | 23 | 11.6 |
| **pH** | 8.07 | 8.16 | 7.61 | 8.02 | 7.62 | 7.88 | 8.01 | 8.03 |
| **ORP** | -72.4 | -53.5 | -26.3 | -44.7 | -59.1 | -44.4 | -74.1 | -74.7 |
| **LDO (mg/l)** | 12.73 | 12.31 | 7.91 | 10.2 | 13.2 | 11.15 | 7.44 | 10.3 |
| **LDO %** | 102.9 | 134.7 | 90 | 88.5 | 107.9 | 122.2 | 87.7 | 99.6 |
| **EC ( µ s/cm)** | 207.2 | 353 | 407 | 465 | 285 | 412 | 404 | 375 |
| **TDS (ppm)** | 133 | 225.9 | 260.5 | 297.6 | 182.4 | 263.68 | 258.6 | 240 |
| **Total Alkalinity  (mg/l CaCO 3 )** | 74.5 | 127 | 147.5 | 214 | 109.5 | 155.5 | 172 | 164.5 |
| **Blur (ntu)** | 1.95 | 0.73 | 1.52 | 1.32 | 0.85 | 1.12 | 1.55 | 1.46 |
| **Color (Pt-Co)  465 nm** | 28 | 11 | 14 | 21 | 6 | 18 | 28 | 33 |
| **Color ( m⁻¹ )  436 nm** | 0.52 | 0.28 | 0.36 | 0.64 | 0.76 | 0.56 | 0.28 | 0.64 |
| **Color ( m⁻¹ )  525 nm** | 0.24 | 0.08 | 0.12 | 0.52 | 0.52 | 0.32 | 0.24 | 0.48 |
| **Color (m⁻¹ ) 620  nm** | 0.2 | 0.04 | 0.04 | 0.24 | 0.44 | 0.12 | 0.2 | 0.36 |
| ***Colorizations are based on Annex-5 Table 2 of the Surface Water Quality Regulation and the repealed (17.12.2022) Water Pollution Control Regulation Table-1: Quality Criteria According to the Classes of Inland Water Resources. Accordingly:** | | | | | | | | |
| **Water Quality Classes** |  | **I (Very good)** |  | **II (Good)** |  | **III (middle)** |  | **IV (Weak)** |
| **CLIMATIC/GEOGRAPHIC PARAMETER DATA** | | | | | | | | |
| **Year** | **2021** | | | | **2022** | | | |
| **Season** | **Winter** | **Spring** | **Summer** | **Autumn** | **Winter** | **Spring** | **Summer** | **Autumn** |
| **Current Air  Temperature ( ° C)** | 9 | 24.3 | 28.4 | 9 | 13.9 | 21.8 | 26.5 | 14.8 |
| **Wind** | 3 | 12 | 12 | 4 | 8 | 6 | 17 | 10 |
| **Water Level (Qualitative)**** | 2 | 1 | 1 | 2 | 4 | 3 | 2 | 1 |
| **Elevation** | 39 meters | | | | | | | |
| ****Water level was evaluated on a scale of 1 to 5.**** | | | | | | | | |

# APPENDIX-20: Microbiological Culture and Molecular Analysis Results of Yavuz Creek – Upper Branch (5Y)

| **MICROBIOLOGICAL CULTURE ANALYSIS RESULTS*** | | | | | | | | |
| --- | --- | --- | --- | --- | --- | --- | --- | --- |
| **Year** | **2021** | | | | **2022** | | | |
| **Season** | **Winter** | **Spring** | **Summer** | **Autumn** | **Winter** | **Spring** | **Summer** | **Autumn** |
| **Total Coliform  (cfu/100ml)** | 698 | 6820 | 14430 | 1430 | 148 | 2440 | 2050 | 1010 |
| **Fecal Coliform  (cfu/100ml)** | 16 | 20 | 88 | 18 | 9 | 16 | 1110 | 125 |
| **Fecal Streptococcus (Enterococcus)  (cfu/100ml)** | 14 | 52 | 30 | 4 | 0 | 6 | 35 | 220 |
| ***Clostridium perfringens* (Vegetative+Sport)  (cfu/100ml)** | 0 | 0 | 1 | 0 | 0 | 0 | 14 | 2 |
| ***Clostridia* (Spores Only)  (cfu/100ml)** | 4 | 10 | 40 | 5 | 5 | 16 | 0 | 11 |
| ***Clostridia* (Vegetative+Sport)  (cfu/100ml)** | 16 | 542 | 1575 | 5 | 37 | 94 | 64 | 214 |
| ***Pseudomonas aeruginosa*  (cfu/100ml)** | 0 | 0 | 0 | 0 | 0 | 0 | 0 | 0 |
| **36 ° C Total Germ Count  (cfu/1ml)** | 67 | 2640 | 1280 | 630 | 47 | 1170 | 4560 | 2720 |
| **22 ° C Total Germ Count  (cfu/1ml)** | 4480 | 8480 | 7920 | 1700 | 675 | 3860 | 15680 | 4870 |
| ***Colorizations are based on Annex-5 Table 2 of the Surface Water Quality Regulation and the repealed (17.12.2022) Water Pollution Control Regulation Table-1: Quality Criteria According to the Classes of Inland Water Resources. Accordingly:** | | | | | | | | |
| **Water Quality Classes** |  | **I (Very good)** |  | **II (Good)** |  | **III (middle)** |  | **IV (Weak)** |
| **MOLECULAR ANALYSIS RESULTS** | | | | | | | | |
| **Year** | **2021** | | | | **2022** | | | |
| **Season** | **Winter** | **Spring** | **Summer** | **Autumn** | **Winter** | **Spring** | **Summer** | **Autumn** |
| **BacUni  (log10 gc/100ml)** | 4.18 | 5.53 | 5.90 | 4.90 | 3.73 | 5.00 | 5.99 | 5.57 |
| **HF183  (log10 gc/100ml)** | 2.95 | 3.40 | 4.11 | 2.78 | LOD | 3.04 | 5.08 | 4.11 |
| **Bachum  (log10 gc/100ml)** | 3.00 | 3.51 | 4.23 | 2.60 | 2.04 | 3.11 | 5.23 | 3.94 |
| **BacCow  (log10 gc/100ml)** | 3.18 | 3.36 | 3.86 | 2.70 | LOD | 2.83 | 3.72 | 2.79 |
| **BacR  (log10 gc/100ml)** | 3.00 | 3.23 | 3.81 | 2.18 | LOD | LOD | 3.52 | LOD |
| **LOD: Limit of Detection** | | | | | | | | |

# APPENDIX-21: Physicochemical Analysis Results and Climatic/Geographical Parameter Data of Deniz Gölü (6D)

| **PHYSICAL-CHEMICAL ANALYSIS RESULTS*** | | | | | | | | |
| --- | --- | --- | --- | --- | --- | --- | --- | --- |
| **Year** | **2021** | | | | **2022** | | | |
| **Season** | **Winter** | **Spring** | **Summer** | **Autumn** | **Winter** | **Spring** | **Summer** | **Autumn** |
| **Water Temperature ( ° C)** | 7.8 | 22.4 | 24.5 | 11.1 | 9.1 | 21.3 | 25.5 | 13.3 |
| **pH** | 7.77 | 8.4 | 8.12 | 8.21 | 7.49 | 7.92 | 8.52 | 8.6 |
| **ORP** | -56.1 | -65.8 | -52.2 | -53.9 | -51.1 | -52.3 | -77.1 | -69.6 |
| **LDO (mg/l)** | 10.77 | 11.53 | 4.05 | 0.18 | 10.13 | 12.2 | 6.96 | 3.01 |
| **LDO %** | 87.8 | 133.4 | 49 | 1.7 | 86.5 | 114.2 | 77.2 | 23 |
| **EC ( µ s/cm)** | 161.9 | 583 | 447 | 390 | 324.6 | 477 | 448 | 496 |
| **TDS (ppm)** | 104 | 373.1 | 286.1 | 249.6 | 207.7 | 305.28 | 286.7 | 317.44 |
| **Total Alkalinity  (mg/l CaCO 3 )** | 62.5 | 104 | 128 | 170 | 66.5 | 111.5 | 147 | 216 |
| **Blur (ntu)** | 2.89 | 1.48 | 1.28 | 9.09 | 4.36 | 1.16 | 1.45 | 8.45 |
| **Color (Pt-Co)  465 nm** | 40 | 23 | 19 | 52 | 44 | 18 | 29 | 48 |
| **Color ( m⁻¹ )  436 nm** | 0.68 | 0.84 | 0.64 | 1.64 | 0.84 | 0.76 | 0.88 | 1.56 |
| **Color ( m⁻¹ )  525 nm** | 0.24 | 0.32 | 0.16 | 0.64 | 0.24 | 0.28 | 0.24 | 0.88 |
| **Color (m⁻¹ ) 620  nm** | 0.16 | 0.2 | 0 | 0.4 | 0.2 | 0.2 | 0.12 | 0.64 |
| ***Colorizations are based on Annex-5 Table 2 of the Surface Water Quality Regulation and the repealed (17.12.2022) Water Pollution Control Regulation Table-1: Quality Criteria According to the Classes of Inland Water Resources. Accordingly:** | | | | | | | | |
| **Water Quality Classes** |  | **I (Very good)** |  | **II (Good)** |  | **III (middle)** |  | **IV (Weak)** |
| **CLIMATIC/GEOGRAPHIC PARAMETER DATA** | | | | | | | | |
| **Year** | **2021** | | | | **2022** | | | |
| **Season** | **Winter** | **Spring** | **Summer** | **Autumn** | **Winter** | **Spring** | **Summer** | **Autumn** |
| **Current Air  Temperature ( ° C)** | 12 | 23.6 | 26 | 13.3 | 11.5 | 22.8 | 27.5 | 15.1 |
| **Wind** | 14 | 22 | 22 | 10 | 22 | 22 | 20 | 18 |
| **Water Level (Qualitative)**** | 2 | 3 | 2 | 2 | 4 | 4 | 2 | 1 |
| **Elevation** | 0 meters | | | | | | | |
| ****Water level was evaluated on a scale of 1 to 5.**** | | | | | | | | |

# APPENDIX-22: Microbiological Culture and Molecular Analysis Results of Deniz Gölü (6D)

| **MICROBIOLOGICAL CULTURE ANALYSIS RESULTS*** | | | | | | | | |
| --- | --- | --- | --- | --- | --- | --- | --- | --- |
| **Year** | **2021** | | | | **2022** | | | |
| **Season** | **Winter** | **Spring** | **Summer** | **Autumn** | **Winter** | **Spring** | **Summer** | **Autumn** |
| **Total Coliform  (cfu/100ml)** | 3770 | 7480 | 4490 | 4260 | 1250 | 4710 | 3530 | 2540 |
| **Fecal Coliform  (cfu/100ml)** | 624 | 100 | 112 | 95 | 96 | 116 | 520 | 476 |
| **Fecal Streptococcus (Enterococcus)  (cfu/100ml)** | 10 | 2 | 30 | 24 | 14 | 28 | 185 | 252 |
| ***Clostridium perfringens* (Vegetative+Sport)  (cfu/100ml)** | 9 | 6 | 2 | 2 | 1 | 4 | 6 | 11 |
| ***Clostridia* (Spores Only)  (cfu/100ml)** | 10 | 96 | 40 | 100 | 17 | 71 | 48 | 117 |
| ***Clostridia* (Vegetative+Sport)  (cfu/100ml)** | 52 | 132 | 810 | 1020 | 98 | 146 | 1112 | 965 |
| ***Pseudomonas aeruginosa*  (cfu/100ml)** | 0 | 0 | 0 | 0 | 0 | 0 | 0 | 0 |
| **36 ° C Total Germ Count  (cfu/1ml)** | 560 | 2040 | 1860 | 3360 | 272 | 1450 | 13300 | 4210 |
| **22 ° C Total Germ Count  (cfu/1ml)** | 7340 | 2960 | 6240 | 33200 | 1530 | 3210 | 21500 | 26400 |
| ***Colorizations are based on Annex-5 Table 2 of the Surface Water Quality Regulation and the repealed (17.12.2022) Water Pollution Control Regulation Table-1: Quality Criteria According to the Classes of Inland Water Resources. Accordingly:** | | | | | | | | |
| **Water Quality Classes** |  | **I (Very good)** |  | **II (Good)** |  | **III (middle)** |  | **IV (Weak)** |
| **MOLECULAR ANALYSIS RESULTS** | | | | | | | | |
| **Year** | **2021** | | | | **2022** | | | |
| **Season** | **Winter** | **Spring** | **Summer** | **Autumn** | **Winter** | **Spring** | **Summer** | **Autumn** |
| **BacUni  (log10 gc/100ml)** | 5.04 | 5.85 | 5.62 | 5.95 | 4.41 | 5.81 | 6.32 | 6.11 |
| **HF183  (log10 gc/100ml)** | 3.79 | 4.32 | 3.93 | 3.79 | 3.08 | 4.26 | 5.26 | 4.28 |
| **Bachum  (log10 gc/100ml)** | 3.73 | 4.34 | 3.63 | 3.52 | 2.94 | 4.34 | 5.04 | 4.11 |
| **BacCow  (log10 gc/100ml)** | 3.62 | 3.98 | 3.62 | 3.40 | 2.40 | 3.94 | 4.95 | 3.63 |
| **BacR  (log10 gc/100ml)** | 3.58 | 4.11 | 3.68 | 3.52 | 3.08 | 3.87 | 5.15 | 3.94 |
| **LOD: Limit of Detection** | | | | | | | | |

# APPENDIX-23: Physicochemical Analysis Results and Climatic/Geographical Parameter Data for Bulanık Creek – Next to the Nursery (7B)

| **PHYSICAL-CHEMICAL ANALYSIS RESULTS*** | | | | | | | | |
| --- | --- | --- | --- | --- | --- | --- | --- | --- |
| **Year** | **2021** | | | | **2022** | | | |
| **Season** | **Winter** | **Spring** | **Summer** | **Autumn** | **Winter** | **Spring** | **Summer** | **Autumn** |
| **Water Temperature ( ° C)** | 10.2 | 26.5 | 28.1 | 10.5 | 11.1 | 23.1 | 28.1 | 12.9 |
| **pH** | 7.63 | 8.25 | 8.28 | 8.44 | 7.43 | 7.9 | 8.12 | 8.33 |
| **ORP** | -48.8 | -59.4 | -61.1 | -64.9 | -48.4 | -52.8 | -80.5 | -75.6 |
| **LDO (mg/l)** | 10.85 | 8 | 8.73 | 10.3 | 11,12 | 9.8 | 7.95 | 11.1 |
| **LDO %** | 96.5 | 100.2 | 111.5 | 103.6 | 98 | 99.8 | 102.5 | 106.3 |
| **EC ( µ s/cm)** | 189 | 283 | 349 | 315 | 233 | 311 | 309 | 322 |
| **TDS (ppm)** | 121 | 181.1 | 223.4 | 201.6 | 149.1 | 199.04 | 197.8 | 206.08 |
| **Total Alkalinity  (mg/l CaCO 3 )** | 68.5 | 103 | 129.5 | 140 | 92 | 96 | 135 | 147.5 |
| **Blur (ntu)** | 13.5 | 1.11 | 1.37 | 3.27 | 3.26 | 1.24 | 4.18 | 3.45 |
| **Color (Pt-Co)  465 nm** | 57 | 12 | 20 | 11 | 16 | 10 | 41 | 34 |
| **Color ( m⁻¹ )  436 nm** | 1.28 | 0.48 | 0.52 | 0.28 | 0.64 | 0.4 | 0.84 | 0.76 |
| **Color ( m⁻¹ )  525 nm** | 0.76 | 0.2 | 0.24 | 0.12 | 0.36 | 0.24 | 0.6 | 0.52 |
| **Color (m⁻¹ ) 620  nm** | 0.52 | 0.08 | 0.08 | 0.04 | 0.24 | 0.12 | 0.56 | 0.48 |
| ***Colorizations are based on Annex-5 Table 2 of the Surface Water Quality Regulation and the repealed (17.12.2022) Water Pollution Control Regulation Table-1: Quality Criteria According to the Classes of Inland Water Resources. Accordingly:** | | | | | | | | |
| **Water Quality Classes** |  | **I (Very good)** |  | **II (Good)** |  | **III (middle)** |  | **IV (Weak)** |
| **CLIMATIC/GEOGRAPHIC PARAMETER DATA** | | | | | | | | |
| **Year** | **2021** | | | | **2022** | | | |
| **Season** | **Winter** | **Spring** | **Summer** | **Autumn** | **Winter** | **Spring** | **Summer** | **Autumn** |
| **Current Air  Temperature ( ° C)** | 10 | 26.8 | 24.5 | 13.2 | 15.6 | 22.4 | 29.5 | 14.3 |
| **Wind** | 11 | 13 | 23 | 8 | 9 | 6 | 16 | 8 |
| **Water Level (Qualitative)**** | 2 | 2 | 2 | 2 | 4 | 3 | 2 | 1 |
| **Elevation** | 15 meters | | | | | | | |
| ****Water level was evaluated on a scale of 1 to 5.**** | | | | | | | | |

# APPENDIX-24: Microbiological Culture and Molecular Analysis Results of Bulanık Creek – Next to the Nursery (7B)

| **MICROBIOLOGICAL CULTURE ANALYSIS RESULTS*** | | | | | | | | |
| --- | --- | --- | --- | --- | --- | --- | --- | --- |
| **Year** | **2021** | | | | **2022** | | | |
| **Season** | **Winter** | **Spring** | **Summer** | **Autumn** | **Winter** | **Spring** | **Summer** | **Autumn** |
| **Total Coliform  (cfu/100ml)** | 1560 | 4840 | 31600 | 1102 | 885 | 1990 | 12550 | 8750 |
| **Fecal Coliform  (cfu/100ml)** | 920 | 60 | 120 | 31 | 144 | 88 | 1430 | 990 |
| **Fecal Streptococcus (Enterococcus)  (cfu/100ml)** | 152 | 20 | 220 | 4 | 84 | 116 | 226 | 455 |
| ***Clostridium perfringens* (Vegetative+Sport)  (cfu/100ml)** | 6 | 19 | 6 | 1 | 12 | 28 | 16 | 9 |
| ***Clostridia* (Spores Only)  (cfu/100ml)** | 36 | 26 | 70 | 10 | 73 | 18 | 24 | 8 |
| ***Clostridia* (Vegetative+Sport)  (cfu/100ml)** | 88 | 70 | 1180 | 115 | 146 | 57 | 2560 | 560 |
| ***Pseudomonas aeruginosa*  (cfu/100ml)** | 10 | 0 | 0 | 0 | 0 | 2 | 0 | 0 |
| **36 ° C Total Germ Count  (cfu/1ml)** | 202 | 420 | 17680 | 690 | 205 | 375 | 14240 | 8810 |
| **22 ° C Total Germ Count  (cfu/1ml)** | 5120 | 1300 | 27420 | 3420 | 930 | 2210 | 16680 | 11200 |
| ***Colorizations are based on Annex-5 Table 2 of the Surface Water Quality Regulation and the repealed (17.12.2022) Water Pollution Control Regulation Table-1: Quality Criteria According to the Classes of Inland Water Resources. Accordingly:** | | | | | | | | |
| **Water Quality Classes** |  | **I (Very good)** |  | **II (Good)** |  | **III (middle)** |  | **IV (Weak)** |
| **MOLECULAR ANALYSIS RESULTS** | | | | | | | | |
| **Year** | **2021** | | | | **2022** | | | |
| **Season** | **Winter** | **Spring** | **Summer** | **Autumn** | **Winter** | **Spring** | **Summer** | **Autumn** |
| **BacUni  (log10 gc/100ml)** | 5.11 | 5.59 | 6.38 | 4.68 | 4.34 | 5.59 | 6.40 | 6.08 |
| **HF183  (log10 gc/100ml)** | 4.30 | 3.52 | 4.60 | 3.34 | 4.15 | 3.72 | 5.53 | 4.54 |
| **Bachum  (log10 gc/100ml)** | 4.20 | 3.57 | 4.48 | 3.41 | 4.04 | 3.59 | 5.72 | 4.89 |
| **BacCow  (log10 gc/100ml)** | 4.08 | 3.43 | 4.26 | 2.95 | 3.94 | 3.87 | 4.04 | 2.89 |
| **BacR  (log10 gc/100ml)** | 4.00 | 3.34 | 4.20 | 2.88 | 3.75 | 3.52 | 3.89 | 3.52 |
| **LOD: Limit of Detection** | | | | | | | | |

# APPENDIX-25: Physicochemical Analysis Results and Climatic/Geographical Parameter Data for Bulanık Stream – National Park Entrance (8B)

| **PHYSICAL-CHEMICAL ANALYSIS RESULTS*** | | | | | | | | |
| --- | --- | --- | --- | --- | --- | --- | --- | --- |
| **Year** | **2021** | | | | **2022** | | | |
| **Season** | **Winter** | **Spring** | **Summer** | **Autumn** | **Winter** | **Spring** | **Summer** | **Autumn** |
| **Water Temperature ( ° C)** | 9.1 | 18.8 | 20.7 | 8.3 | 7.4 | 19.2 | 23.7 | 11.5 |
| **pH** | 7.72 | 7.92 | 7.87 | 8.23 | 7.58 | 7.94 | 7.92 | 8.15 |
| **ORP** | -53.5 | -41.1 | -38.9 | -54.2 | -57.1 | -61.1 | -68.5 | -55.4 |
| **LDO (mg/l)** | 11.67 | 11.66 | 8.59 | 12,14 | 12.98 | 11.92 | 8.19 | 11:45 |
| **LDO %** | 99.9 | 126 | 95.3 | 104.9 | 107.2 | 115.2 | 97.5 | 101.5 |
| **EC ( µ s/cm)** | 184.8 | 278 | 348 | 315 | 231 | 301 | 302 | 334 |
| **TDS (ppm)** | 118 | 177.9 | 222.7 | 201.6 | 147.8 | 192.64 | 193.3 | 213.76 |
| **Total Alkalinity  (mg/l CaCO 3 )** | 73 | 106.5 | 128.5 | 156 | 89 | 96.5 | 128 | 141.5 |
| **Blur (ntu)** | 4.32 | 0.9 | 1,2 | 1.24 | 3.71 | 1.1 | 2.62 | 1.9 |
| **Color (Pt-Co)  465 nm** | 28 | 19 | 10 | 22 | 16 | 14 | 18 | 35 |
| **Color ( m⁻¹ )  436 nm** | 0.84 | 0.56 | 0.44 | 0.44 | 0.56 | 0.44 | 0.64 | 1.04 |
| **Color ( m⁻¹ )  525 nm** | 0.4 | 0.28 | 0.16 | 0.2 | 0.28 | 0.36 | 0.36 | 0.76 |
| **Color (m⁻¹ ) 620  nm** | 0.28 | 0.2 | 0.04 | 0.16 | 0.16 | 0.16 | 0.32 | 0.56 |
| ***Colorizations are based on Annex-5 Table 2 of the Surface Water Quality Regulation and the repealed (17.12.2022) Water Pollution Control Regulation Table-1: Quality Criteria According to the Classes of Inland Water Resources. Accordingly:** | | | | | | | | |
| **Water Quality Classes** |  | **I (Very good)** |  | **II (Good)** |  | **III (middle)** |  | **IV (Weak)** |
| **CLIMATIC/GEOGRAPHIC PARAMETER DATA** | | | | | | | | |
| **Year** | **2021** | | | | **2022** | | | |
| **Season** | **Winter** | **Spring** | **Summer** | **Autumn** | **Winter** | **Spring** | **Summer** | **Autumn** |
| **Current Air  Temperature ( ° C)** | 10 | 21.4 | 21.1 | 11.5 | 10.9 | 20.8 | 25.6 | 13.9 |
| **Wind** | 5 | 10 | 11 | 4 | 12 | 8 | 4 | 6 |
| **Water Level (Qualitative)**** | 3 | 2 | 2 | 2 | 4 | 3 | 2 | 1 |
| **Elevation** | 37 meters | | | | | | | |
| ****Water level was evaluated on a scale of 1 to 5.**** | | | | | | | | |

# APPENDIX-26: Microbiological Culture and Molecular Analysis Results of Bulanık Stream – National Park Entrance (8B)

| **MICROBIOLOGICAL CULTURE ANALYSIS RESULTS*** | | | | | | | | |
| --- | --- | --- | --- | --- | --- | --- | --- | --- |
| **Year** | **2021** | | | | **2022** | | | |
| **Season** | **Winter** | **Spring** | **Summer** | **Autumn** | **Winter** | **Spring** | **Summer** | **Autumn** |
| **Total Coliform  (cfu/100ml)** | 3200 | 26420 | 17840 | 1685 | 3720 | 7470 | 24400 | 10300 |
| **Fecal Coliform  (cfu/100ml)** | 2100 | 60 | 330 | 155 | 860 | 1245 | 960 | 1120 |
| **Fecal Streptococcus (Enterococcus)  (cfu/100ml)** | 182 | 20 | 240 | 15 | 234 | 220 | 75 | 560 |
| ***Clostridium perfringens* (Vegetative+Sport)  (cfu/100ml)** | 5 | 70 | 12 | 4 | 68 | 56 | 81 | 44 |
| ***Clostridia* (Spores Only)  (cfu/100ml)** | 92 | 210 | 170 | 21 | 165 | 194 | 94 | 65 |
| ***Clostridia* (Vegetative+Sport)  (cfu/100ml)** | 182 | 252 | 560 | 140 | 220 | 342 | 3760 | 345 |
| ***Pseudomonas aeruginosa*  (cfu/100ml)** | 0 | 0 | 1 | 0 | 0 | 1 | 0 | 0 |
| **36 ° C Total Germ Count  (cfu/1ml)** | 690 | 1260 | 5200 | 1720 | 436 | 1150 | 16400 | 10950 |
| **22 ° C Total Germ Count  (cfu/1ml)** | 7480 | 4840 | 25800 | 3967 | 1028 | 2780 | 18500 | 12400 |
| ***Colorizations are based on Annex-5 Table 2 of the Surface Water Quality Regulation and the repealed (17.12.2022) Water Pollution Control Regulation Table-1: Quality Criteria According to the Classes of Inland Water Resources. Accordingly:** | | | | | | | | |
| **Water Quality Classes** |  | **I (Very good)** |  | **II (Good)** |  | **III (middle)** |  | **IV (Weak)** |
| **MOLECULAR ANALYSIS RESULTS** | | | | | | | | |
| **Year** | **2021** | | | | **2022** | | | |
| **Season** | **Winter** | **Spring** | **Summer** | **Autumn** | **Winter** | **Spring** | **Summer** | **Autumn** |
| **BacUni  (log10 gc/100ml)** | 5.65 | 6.18 | 6.23 | 5.04 | 5.52 | 5.88 | 6.49 | 6.30 |
| **HF183  (log10 gc/100ml)** | 4.61 | 4.18 | 4.77 | 4.23 | 4.66 | 5.62 | 5.38 | 6.08 |
| **Bachum  (log10 gc/100ml)** | 4.51 | 4.04 | 4.77 | 4.18 | 4.72 | 5.46 | 5.84 | 5.75 |
| **BacCow  (log10 gc/100ml)** | 3.97 | 3.32 | 3.81 | 3.82 | 3.85 | 4.04 | 4.23 | 4.32 |
| **BacR  (log10 gc/100ml)** | 3.96 | 3.08 | 3.90 | 3.73 | 3.72 | 4.20 | 4.51 | 3.82 |
| **LOD: Limit of Detection** | | | | | | | | |

# APPENDIX-27: Physicochemical Analysis Results and Climatic/Geographical Parameter Data for Bulanık Stream – Demirköy Exit (9B)

| **PHYSICAL-CHEMICAL ANALYSIS RESULTS*** | | | | | | | | |
| --- | --- | --- | --- | --- | --- | --- | --- | --- |
| **Year** | **2021** | | | | **2022** | | | |
| **Season** | **Winter** | **Spring** | **Summer** | **Autumn** | **Winter** | **Spring** | **Summer** | **Autumn** |
| **Water Temperature ( ° C)** | 5.4 | 16.6 | 18.6 | 6.1 | 5,6 | 18.1 | 19.1 | 10.2 |
| **pH** | 7.24 | 7.72 | 7.54 | 8.01 | 7.48 | 7.51 | 7.73 | 7.95 |
| **ORP** | -26.9 | -31 | -22.1 | -43.5 | -51.5 | -24.4 | -57.7 | -54.8 |
| **LDO (mg/l)** | 11.8 | 9.14 | 7.19 | 10.41 | 11.85 | 10,12 | 7.14 | 11.3 |
| **LDO %** | 93.6 | 95.5 | 73.8 | 87.1 | 94.7 | 101.1 | 78.9 | 94.5 |
| **EC ( µ s/cm)** | 211 | 304 | 348 | 337 | 264 | 322 | 334 | 326 |
| **TDS (ppm)** | 135 | 194.6 | 222.7 | 215.7 | 169 | 206.08 | 213.8 | 208.64 |
| **Total Alkalinity  (mg/l CaCO 3 )** | 87.5 | 117 | 118 | 142.5 | 105 | 114.5 | 135 | 122.5 |
| **Blur (ntu)** | 4.82 | 1.49 | 0.83 | 2.2 | 5.01 | 1.22 | 2.82 | 2.1 |
| **Color (Pt-Co)  465 nm** | 35 | 13 | 10 | 17 | 29 | 14 | 34 | 21 |
| **Color ( m⁻¹ )  436 nm** | 0.64 | 0.48 | 0.52 | 0.48 | 0.76 | 0.44 | 0.8 | 0.64 |
| **Color ( m⁻¹ )  525 nm** | 0.4 | 0.24 | 0.16 | 0.2 | 0.56 | 0.28 | 0.36 | 0.48 |
| **Color (m⁻¹ ) 620  nm** | 0.28 | 0.12 | 0.04 | 0.08 | 0.4 | 0.12 | 0.24 | 0.28 |
| ***Colorizations are based on Annex-5 Table 2 of the Surface Water Quality Regulation and the repealed (17.12.2022) Water Pollution Control Regulation Table-1: Quality Criteria According to the Classes of Inland Water Resources. Accordingly:** | | | | | | | | |
| **Water Quality Classes** |  | **I (Very good)** |  | **II (Good)** |  | **III (middle)** |  | **IV (Weak)** |
| **CLIMATIC/GEOGRAPHIC PARAMETER DATA** | | | | | | | | |
| **Year** | **2021** | | | | **2022** | | | |
| **Season** | **Winter** | **Spring** | **Summer** | **Autumn** | **Winter** | **Spring** | **Summer** | **Autumn** |
| **Current Air  Temperature ( ° C)** | 7 | 16 | 18.6 | 5.1 | 8.5 | 20.1 | 23.9 | 12.8 |
| **Wind** | 3 | 11 | 6 | 4 | 7 | 8 | 2 | 4 |
| **Water Level (Qualitative)**** | 3 | 3 | 2 | 2 | 4 | 3 | 2 | 1 |
| **Elevation** | 150 meters | | | | | | | |
| ****Water level was evaluated on a scale of 1 to 5.**** | | | | | | | | |

# APPENDIX-28: Microbiological Culture and Molecular Analysis Results of Bulanık Stream – Demirköy Exit (9B)

| **MICROBIOLOGICAL CULTURE ANALYSIS RESULTS*** | | | | | | | | |
| --- | --- | --- | --- | --- | --- | --- | --- | --- |
| **Year** | **2021** | | | | **2022** | | | |
| **Season** | **Winter** | **Spring** | **Summer** | **Autumn** | **Winter** | **Spring** | **Summer** | **Autumn** |
| **Total Coliform  (cfu/100ml)** | 7300 | 48000 | 32400 | 28100 | 28800 | 36400 | 55100 | 41300 |
| **Fecal Coliform  (cfu/100ml)** | 3300 | 14400 | 9900 | 11700 | 14200 | 16500 | 11300 | 12200 |
| **Fecal Streptococcus (Enterococcus)  (cfu/100ml)** | 960 | 1720 | 3800 | 332 | 1600 | 1540 | 540 | 2400 |
| ***Clostridium perfringens* (Vegetative+Sport)  (cfu/100ml)** | 32 | 730 | 80 | 180 | 190 | 150 | 90 | 230 |
| ***Clostridia* (Spores Only)  (cfu/100ml)** | 144 | 274 | 150 | 240 | 110 | 185 | 730 | 450 |
| ***Clostridia* (Vegetative+Sport)  (cfu/100ml)** | 192 | 1680 | 2700 | 560 | 540 | 590 | 1150 | 990 |
| ***Pseudomonas aeruginosa*  (cfu/100ml)** | 20 | 10 | 2 | 102 | 0 | 36 | 600 | 125 |
| **36 ° C Total Germ Count  (cfu/1ml)** | 1034 | 10320 | 16900 | 4880 | 1584 | 7430 | 41600 | 26500 |
| **22 ° C Total Germ Count  (cfu/1ml)** | 9600 | 22560 | 40800 | 35700 | 6560 | 14200 | 55600 | 31700 |
| ***Colorizations are based on Annex-5 Table 2 of the Surface Water Quality Regulation and the repealed (17.12.2022) Water Pollution Control Regulation Table-1: Quality Criteria According to the Classes of Inland Water Resources. Accordingly:** | | | | | | | | |
| **Water Quality Classes** |  | **I (Very good)** |  | **II (Good)** |  | **III (middle)** |  | **IV (Weak)** |
| **MOLECULAR ANALYSIS RESULTS** | | | | | | | | |
| **Year** | **2021** | | | | **2022** | | | |
| **Season** | **Winter** | **Spring** | **Summer** | **Autumn** | **Winter** | **Spring** | **Summer** | **Autumn** |
| **BacUni  (log10 gc/100ml)** | 5.97 | 6.68 | 6.53 | 6.53 | 6.08 | 6.59 | 6.76 | 6.64 |
| **HF183  (log10 gc/100ml)** | 4.81 | 6.52 | 6.32 | 6.26 | 5.43 | 6.49 | 6.58 | 6.56 |
| **Bachum  (log10 gc/100ml)** | 4.77 | 6.48 | 6.26 | 6.20 | 5.73 | 6.28 | 6.46 | 6.51 |
| **BacCow  (log10 gc/100ml)** | 4.34 | 5.04 | 5.54 | 5.79 | 4.83 | 5.41 | 5.38 | 6.46 |
| **BacR  (log10 gc/100ml)** | 4.23 | 5.15 | 5.46 | 5.74 | 4.64 | 5.73 | 5.23 | 6.26 |
| **LOD: Limit of Detection** | | | | | | | | |

# APPENDIX-29: Physicochemical Analysis Results and Climatic/Geographical Parameter Data for Bulanık Stream – Demirköy Entrance (10B)

| **PHYSICAL-CHEMICAL ANALYSIS RESULTS*** | | | | | | | | |
| --- | --- | --- | --- | --- | --- | --- | --- | --- |
| **Year** | **2021** | | | | **2022** | | | |
| **Season** | **Winter** | **Spring** | **Summer** | **Autumn** | **Winter** | **Spring** | **Summer** | **Autumn** |
| **Water Temperature ( ° C)** | 4.9 | 15.8 | 18.6 | 6.3 | 5.7 | 17.2 | 19.5 | 9.6 |
| **pH** | 7.4 | 7.37 | 7.6 | 8.3 | 7.15 | 7.44 | 7.61 | 8.2 |
| **ORP** | -35.5 | -17.6 | -25.6 | -57.2 | -32.7 | -24.5 | -50.8 | -61.3 |
| **LDO (mg/l)** | 12.05 | 9.22 | 7.33 | 10.2 | 11.67 | 9.88 | 7.44 | 10.8 |
| **LDO %** | 94.7 | 94.9 | 78 | 85.4 | 93.4 | 96.1 | 82.9 | 95.1 |
| **EC ( µ s/cm)** | 135.1 | 186.8 | 228 | 225 | 153.3 | 216.2 | 202.1 | 226.9 |
| **TDS (ppm)** | 86.4 | 119.6 | 145.9 | 144 | 98.11 | 138,368 | 129.3 | 145,216 |
| **Total Alkalinity  (mg/l CaCO 3 )** | 47.5 | 71.5 | 81.5 | 97.5 | 58 | 82 | 89 | 95.5 |
| **Blur (ntu)** | 5.45 | 2.97 | 1.15 | 1.11 | 2.55 | 1.23 | 2.83 | 2.12 |
| **Color (Pt-Co)  465 nm** | 35 | 22 | 15 | 15 | 19 | 14 | 30 | 21 |
| **Color ( m⁻¹ )  436 nm** | 0.92 | 0.72 | 0.56 | 0.44 | 0.96 | 0.48 | 0.8 | 0.96 |
| **Color ( m⁻¹ )  525 nm** | 0.44 | 0.32 | 0.25 | 0.24 | 0.56 | 0.24 | 0.32 | 0.64 |
| **Color (m⁻¹ ) 620  nm** | 0.28 | 0.2 | 0.04 | 0 | 0.48 | 0.08 | 0.28 | 0.48 |
| ***Colorizations are based on Annex-5 Table 2 of the Surface Water Quality Regulation and the repealed (17.12.2022) Water Pollution Control Regulation Table-1: Quality Criteria According to the Classes of Inland Water Resources. Accordingly:** | | | | | | | | |
| **Water Quality Classes** |  | **I (Very good)** |  | **II (Good)** |  | **III (middle)** |  | **IV (Weak)** |
| **CLIMATIC/GEOGRAPHIC PARAMETER DATA** | | | | | | | | |
| **Year** | **2021** | | | | **2022** | | | |
| **Season** | **Winter** | **Spring** | **Summer** | **Autumn** | **Winter** | **Spring** | **Summer** | **Autumn** |
| **Current Air  Temperature ( ° C)** | 6 | 17 | 18.6 | 8.5 | 9.2 | 19.4 | 24.8 | 11.5 |
| **Wind** | 5 | 14 | 5 | 3 | 5 | 10 | 4 | 6 |
| **Water Level (Qualitative)**** | 2 | 1 | 1 | 2 | 3 | 3 | 2 | 1 |
| **Elevation** | 193 meters | | | | | | | |
| ****Water level was evaluated on a scale of 1 to 5.**** | | | | | | | | |

# APPENDIX-30: Microbiological Culture and Molecular Analysis Results of Bulanık Stream – Demirköy Entrance (10B)

| **MICROBIOLOGICAL CULTURE ANALYSIS RESULTS*** | | | | | | | | |
| --- | --- | --- | --- | --- | --- | --- | --- | --- |
| **Year** | **2021** | | | | **2022** | | | |
| **Season** | **Winter** | **Spring** | **Summer** | **Autumn** | **Winter** | **Spring** | **Summer** | **Autumn** |
| **Total Coliform  (cfu/100ml)** | 684 | 1880 | 24350 | 291 | 377 | 744 | 4750 | 1450 |
| **Fecal Coliform  (cfu/100ml)** | 420 | 440 | 610 | 13 | 133 | 358 | 770 | 330 |
| **Fecal Streptococcus (Enterococcus)  (cfu/100ml)** | 86 | 120 | 340 | 14 | 24 | 66 | 225 | 27 |
| ***Clostridium perfringens* (Vegetative+Sport)  (cfu/100ml)** | 7 | 8 | 27 | 0 | 2 | 4 | 13 | 4 |
| ***Clostridia* (Spores Only)  (cfu/100ml)** | 18 | 32 | 70 | 3 | 15 | 42 | 17 | 9 |
| ***Clostridia* (Vegetative+Sport)  (cfu/100ml)** | 20 | 107 | 180 | 10 | 21 | 156 | 250 | 165 |
| ***Pseudomonas aeruginosa*  (cfu/100ml)** | 0 | 0 | 1 | 0 | 0 | 0 | 0 | 0 |
| **36 ° C Total Germ Count  (cfu/1ml)** | 110 | 300 | 2060 | 1370 | 174 | 289 | 9360 | 2310 |
| **22 ° C Total Germ Count  (cfu/1ml)** | 2560 | 5280 | 9480 | 5760 | 1720 | 2780 | 12960 | 6450 |
| ***Colorizations are based on Annex-5 Table 2 of the Surface Water Quality Regulation and the repealed (17.12.2022) Water Pollution Control Regulation Table-1: Quality Criteria According to the Classes of Inland Water Resources. Accordingly:** | | | | | | | | |
| **Water Quality Classes** |  | **I (Very good)** |  | **II (Good)** |  | **III (middle)** |  | **IV (Weak)** |
| **MOLECULAR ANALYSIS RESULTS** | | | | | | | | |
| **Year** | **2021** | | | | **2022** | | | |
| **Season** | **Winter** | **Spring** | **Summer** | **Autumn** | **Winter** | **Spring** | **Summer** | **Autumn** |
| **BacUni  (log10 gc/100ml)** | 4.30 | 5.15 | 6.32 | 4.20 | 3.99 | 4.89 | 5.74 | 5.60 |
| **HF183  (log10 gc/100ml)** | 3.81 | 4.04 | 5.18 | 2.76 | 3.34 | 4.08 | 4.46 | 4.23 |
| **Bachum  (log10 gc/100ml)** | 3.64 | 4.00 | 5.11 | 2.11 | 2.91 | 3.72 | 4.15 | 4.00 |
| **BacCow  (log10 gc/100ml)** | 3.23 | 3.04 | 4.51 | 3.11 | 3.36 | 3.76 | 4.89 | 3.15 |
| **BacR  (log10 gc/100ml)** | 3.11 | 3.00 | 4.45 | 2.98 | 3.57 | 3.68 | 4.77 | 2.83 |
| **LOD: Limit of Detection** | | | | | | | | |

# APPENDIX-31: Physicochemical Analysis Results and Climatic/Geographical Parameter Data of Bulanık Stream – Lower Branch (18B)

| **PHYSICAL-CHEMICAL ANALYSIS RESULTS*** | | | | | | | | |
| --- | --- | --- | --- | --- | --- | --- | --- | --- |
| **Year** | **2021** | | | | **2022** | | | |
| **Season** | **Winter** | **Spring** | **Summer** | **Autumn** | **Winter** | **Spring** | **Summer** | **Autumn** |
| **Water Temperature ( ° C)** | 5.2 | 15.1 | 16.8 | 7.5 | 4.6 | 18.1 | 19.2 | 12.4 |
| **pH** | 7.88 | 7.8 | 7.8 | 8.37 | 7.35 | 7.78 | 7.78 | 7.82 |
| **ORP** | -61.7 | -35 | -35 | -60.9 | -43.8 | -59.5 | -60.9 | -62.3 |
| **LDO (mg/l)** | 12.04 | 8.9 | 8.16 | 9.85 | 12.23 | 10.3 | 7.91 | 10,11 |
| **LDO %** | 96.6 | 92.3 | 86.4 | 85.2 | 97.6 | 96.4 | 89.6 | 94.6 |
| **EC ( µ s/cm)** | 112.2 | 182.6 | 250 | 220 | 138.9 | 188.4 | 207.2 | 201.3 |
| **TDS (ppm)** | 71.8 | 116.9 | 160 | 140.8 | 88.9 | 120,576 | 132.61 | 128,832 |
| **Total Alkalinity  (mg/l CaCO 3 )** | 45 | 79.5 | 98.5 | 100.5 | 55.5 | 81 | 103.5 | 89.5 |
| **Blur (ntu)** | 2.36 | 1.04 | 0.91 | 0.74 | 2,3 | 1.14 | 1.43 | 0.98 |
| **Color (Pt-Co)  465 nm** | 24 | 14 | 5 | 9 | 19 | 11 | 15 | 9 |
| **Color ( m⁻¹ )  436 nm** | 0.44 | 0.44 | 0.18 | 0.36 | 0.52 | 0.4 | 0.36 | 0.32 |
| **Color ( m⁻¹ )  525 nm** | 0.32 | 0.24 | 0.12 | 0.12 | 0.28 | 0.24 | 0.32 | 0.16 |
| **Color (m⁻¹ ) 620  nm** | 0.24 | 0.12 | 0 | 0.04 | 0.2 | 0.12 | 0.2 | 0.04 |
| ***Colorizations are based on Annex-5 Table 2 of the Surface Water Quality Regulation and the repealed (17.12.2022) Water Pollution Control Regulation Table-1: Quality Criteria According to the Classes of Inland Water Resources. Accordingly:** | | | | | | | | |
| **Water Quality Classes** |  | **I (Very good)** |  | **II (Good)** |  | **III (middle)** |  | **IV (Weak)** |
| **CLIMATIC/GEOGRAPHIC PARAMETER DATA** | | | | | | | | |
| **Year** | **2021** | | | | **2022** | | | |
| **Season** | **Winter** | **Spring** | **Summer** | **Autumn** | **Winter** | **Spring** | **Summer** | **Autumn** |
| **Current Air  Temperature ( ° C)** | 7 | 19 | 20.5 | 8 | 10.5 | 20.8 | 23.3 | 13.1 |
| **Wind** | 3 | 8 | 10 | 10 | 8 | 8 | 4 | 6 |
| **Water Level (Qualitative)**** | 4 | 4 | 3 | 3 | 4 | 3 | 2 | 2 |
| **Elevation** | 328 meters | | | | | | | |
| ****Water level was evaluated on a scale of 1 to 5.**** | | | | | | | | |

# APPENDIX-32: Microbiological Culture and Molecular Analysis Results of Bulanık Stream – Lower Branch (18B)

| **MICROBIOLOGICAL CULTURE ANALYSIS RESULTS*** | | | | | | | | |
| --- | --- | --- | --- | --- | --- | --- | --- | --- |
| **Year** | **2021** | | | | **2022** | | | |
| **Season** | **Winter** | **Spring** | **Summer** | **Autumn** | **Winter** | **Spring** | **Summer** | **Autumn** |
| **Total Coliform  (cfu/100ml)** | 136 | 860 | 1380 | 106 | 181 | 244 | 2160 | 224 |
| **Fecal Coliform  (cfu/100ml)** | 12 | 20 | 140 | 1 | 2 | 18 | 1300 | 38 |
| **Fecal Streptococcus (Enterococcus)  (cfu/100ml)** | 6 | 20 | 110 | 4 | 4 | 11 | 60 | 7 |
| ***Clostridium perfringens* (Vegetative+Sport)  (cfu/100ml)** | 0 | 0 | 0 | 0 | 0 | 0 | 0 | 0 |
| ***Clostridia* (Spores Only)  (cfu/100ml)** | 12 | 36 | 10 | 5 | 22 | 26 | 7 | 3 |
| ***Clostridia* (Vegetative+Sport)  (cfu/100ml)** | 20 | 48 | 70 | 10 | 36 | 40 | 65 | 74 |
| ***Pseudomonas aeruginosa*  (cfu/100ml)** | 0 | 0 | 0 | 0 | 0 | 0 | 0 | 0 |
| **36 ° C Total Germ Count  (cfu/1ml)** | 40 | 120 | 880 | 92 | 37 | 94 | 3120 | 770 |
| **22 ° C Total Germ Count  (cfu/1ml)** | 2400 | 1560 | 4080 | 315 | 718 | 1430 | 6460 | 1520 |
| ***Colorizations are based on Annex-5 Table 2 of the Surface Water Quality Regulation and the repealed (17.12.2022) Water Pollution Control Regulation Table-1: Quality Criteria According to the Classes of Inland Water Resources. Accordingly:** | | | | | | | | |
| **Water Quality Classes** |  | **I (Very good)** |  | **II (Good)** |  | **III (middle)** |  | **IV (Weak)** |
| **MOLECULAR ANALYSIS RESULTS** | | | | | | | | |
| **Year** | **2021** | | | | **2022** | | | |
| **Season** | **Winter** | **Spring** | **Summer** | **Autumn** | **Winter** | **Spring** | **Summer** | **Autumn** |
| **BacUni  (log10 gc/100ml)** | 3.15 | 4.11 | 5.08 | 3.11 | 2.86 | 3.18 | 6.15 | 4.15 |
| **HF183  (log10 gc/100ml)** | 2.04 | 2.70 | 3.56 | LOD | LOD | LOD | 5.40 | 3.41 |
| **Bachum  (log10 gc/100ml)** | 1.90 | 2.48 | 3.26 | LOD | 2.23 | LOD | 5.23 | LOD |
| **BacCow  (log10 gc/100ml)** | LOD | LOD | 2.78 | LOD | LOD | LOD | 4.36 | 2.62 |
| **BacR  (log10 gc/100ml)** | LOD | LOD | 2.90 | LOD | LOD | LOD | 4.28 | LOD |
| **LOD: Limit of Detection** | | | | | | | | |

# APPENDIX-33: Physicochemical Analysis Results and Climatic/Geographical Parameter Data of Mert Lake (11M)

| **PHYSICAL-CHEMICAL ANALYSIS RESULTS*** | | | | | | | | |
| --- | --- | --- | --- | --- | --- | --- | --- | --- |
| **Year** | **2021** | | | | **2022** | | | |
| **Season** | **Winter** | **Spring** | **Summer** | **Autumn** | **Winter** | **Spring** | **Summer** | **Autumn** |
| **Water Temperature ( ° C)** | 10.2 | 24.2 | 26.4 | 11.1 | 11.5 | 22.2 | 27.3 | 14.2 |
| **pH** | 7.45 | 8.25 | 8.85 | 8.81 | 7.85 | 8.02 | 9.34 | 8.94 |
| **ORP** | -39 | -58.9 | -89.3 | -82.5 | -71.9 | -74.7 | -133 | -96.6 |
| **LDO (mg/l)** | 13.48 | 8.02 | 9.64 | 12.68 | 14.64 | 10,12 | 12.23 | 12.36 |
| **LDO %** | 118.3 | 95.9 | 120.5 | 116 | 131.8 | 121.1 | 156.8 | 141.8 |
| **EC ( µ s/cm)** | 1583 | 6740 | 5310 | 8720 | 9310 | 8840 | 11880 | 13490 |
| **TDS (ppm)** | 1013 | 4313.6 | 3398 | 5580.8 | 5958 | 5657.6 | 7603 | 8633.6 |
| **Total Alkalinity  (mg/l CaCO 3 )** | 66.5 | 157 | 192.5 | 233 | 120.5 | 142 | 213 | 251.5 |
| **Blur (ntu)** | 10.6 | 4.01 | 11.4 | 4.3 | 1.48 | 2.15 | 40.6 | 22.7 |
| **Color (Pt-Co)  465 nm** | 91 | 31 | 167 | 70 | 28 | 37 | 126 | 98 |
| **Color ( m⁻¹ )  436 nm** | 2.72 | 1.08 | 5.04 | 1.68 | 0.72 | 1.12 | 4.48 | 2.84 |
| **Color ( m⁻¹ )  525 nm** | 1.48 | 0.48 | 3.16 | 1.36 | 0.32 | 0.84 | 2.28 | 1.88 |
| **Color (m⁻¹ ) 620  nm** | 0.92 | 0.24 | 0.24 | 1.16 | 0.12 | 0.32 | 2.2 | 1.04 |
| ***Colorizations are based on Annex-5 Table 2 of the Surface Water Quality Regulation and the repealed (17.12.2022) Water Pollution Control Regulation Table-1: Quality Criteria According to the Classes of Inland Water Resources. Accordingly:** | | | | | | | | |
| **Water Quality Classes** |  | **I (Very good)** |  | **II (Good)** |  | **III (middle)** |  | **IV (Weak)** |
| **CLIMATIC/GEOGRAPHIC PARAMETER DATA** | | | | | | | | |
| **Year** | **2021** | | | | **2022** | | | |
| **Season** | **Winter** | **Spring** | **Summer** | **Autumn** | **Winter** | **Spring** | **Summer** | **Autumn** |
| **Current Air  Temperature ( ° C)** | 5 | 20.6 | 26.6 | 15.9 | 12.5 | 24.4 | 28.3 | 17.4 |
| **Wind** | 5 | 18 | 15 | 15 | 22 | 18 | 13 | 16 |
| **Water Level (Qualitative)**** | 2 | 3 | 2 | 2 | 4 | 4 | 3 | 2 |
| **Elevation** | 0 meters | | | | | | | |
| ****Water level was evaluated on a scale of 1 to 5.**** | | | | | | | | |

# APPENDIX-34: Microbiological Culture and Molecular Analysis Results of Mert Lake (11M)

| **MICROBIOLOGICAL CULTURE ANALYSIS RESULTS*** | | | | | | | | |
| --- | --- | --- | --- | --- | --- | --- | --- | --- |
| **Year** | **2021** | | | | **2022** | | | |
| **Season** | **Winter** | **Spring** | **Summer** | **Autumn** | **Winter** | **Spring** | **Summer** | **Autumn** |
| **Total Coliform  (cfu/100ml)** | 292 | 32240 | 68250 | 500 | 1116 | 1220 | 1470 | 1210 |
| **Fecal Coliform  (cfu/100ml)** | 18 | 2320 | 800 | 260 | 58 | 440 | 168 | 81 |
| **Fecal Streptococcus (Enterococcus)  (cfu/100ml)** | 14 | 480 | 400 | 11 | 46 | 48 | 24 | 9 |
| ***Clostridium perfringens* (Vegetative+Sport)  (cfu/100ml)** | 0 | 156 | 20 | 2 | 22 | 16 | 2 | 0 |
| ***Clostridia* (Spores Only)  (cfu/100ml)** | 16 | 1440 | 200 | 10 | 4 | 56 | 256 | 110 |
| ***Clostridia* (Vegetative+Sport)  (cfu/100ml)** | 102 | 2880 | 13700 | 640 | 185 | 560 | 18900 | 1120 |
| ***Pseudomonas aeruginosa*  (cfu/100ml)** | 5 | 0 | 0 | 0 | 0 | 0 | 0 | 0 |
| **36 ° C Total Germ Count  (cfu/1ml)** | 156 | 4920 | 1260 | 540 | 296 | 710 | 296 | 104 |
| **22 ° C Total Germ Count  (cfu/1ml)** | 19200 | 2080 | 5520 | 840 | 724 | 1020 | 1110 | 920 |
| ***Colorizations are based on Annex-5 Table 2 of the Surface Water Quality Regulation and the repealed (17.12.2022) Water Pollution Control Regulation Table-1: Quality Criteria According to the Classes of Inland Water Resources. Accordingly:** | | | | | | | | |
| **Water Quality Classes** |  | **I (Very good)** |  | **II (Good)** |  | **III (middle)** |  | **IV (Weak)** |
| **MOLECULAR ANALYSIS RESULTS** | | | | | | | | |
| **Year** | **2021** | | | | **2022** | | | |
| **Season** | **Winter** | **Spring** | **Summer** | **Autumn** | **Winter** | **Spring** | **Summer** | **Autumn** |
| **BacUni  (log10 gc/100ml)** | 3.94 | 6.57 | 6.49 | 4.28 | 3.97 | 6.04 | 6.20 | 4.66 |
| **HF183  (log10 gc/100ml)** | 2.53 | 5.77 | 5.46 | 3.98 | 3.04 | 5.49 | 5.62 | 4.04 |
| **Bachum  (log10 gc/100ml)** | 2.49 | 5.60 | 5.36 | 3.89 | 3.36 | 5.67 | 5.04 | 3.98 |
| **BacCow  (log10 gc/100ml)** | 2.18 | 4.57 | 4.89 | 2.89 | 2.94 | 4.08 | 3.99 | 3.52 |
| **BacR  (log10 gc/100ml)** | 2.23 | 4.45 | 4.94 | 2.64 | 2.72 | 3.75 | 3.64 | 3.41 |
| **LOD: Limit of Detection** | | | | | | | | |

# APPENDIX-35: Physicochemical Analysis Results and Climatic/Geographical Parameter Data of Çavuşköprü Stream (12Ç)

| **PHYSICAL-CHEMICAL ANALYSIS RESULTS*** | | | | | | | | |
| --- | --- | --- | --- | --- | --- | --- | --- | --- |
| **Year** | **2021** | | | | **2022** | | | |
| **Season** | **Winter** | **Spring** | **Summer** | **Autumn** | **Winter** | **Spring** | **Summer** | **Autumn** |
| **Water Temperature ( ° C)** | 8.7 | 18.9 | 20.2 | 9.4 | 8.2 | 20.6 | 20.8 | 13.1 |
| **pH** | 7.8 | 8.35 | 8.19 | 8.61 | 7.86 | 8.22 | 7.67 | 7.74 |
| **ORP** | -59.4 | -62.6 | -54.5 | -72.8 | -72.4 | -64.3 | -54.2 | -49.9 |
| **LDO (mg/l)** | 11.16 | 8.35 | 2.37 | 9.45 | 13.16 | 9.24 | 4.84 | 8.89 |
| **LDO %** | 96 | 91.9 | 26.2 | 83.8 | 109.7 | 95.6 | 53.9 | 81.5 |
| **EC ( µ s/cm)** | 204.6 | 335 | 472 | 370 | 300 | 345 | 399 | 342 |
| **TDS (ppm)** | 131 | 214.4 | 302.1 | 236.8 | 192 | 220.8 | 255.36 | 218.88 |
| **Total Alkalinity  (mg/l CaCO 3 )** | 82.5 | 141.5 | 181.5 | 186 | 137.5 | 135.5 | 191 | 178 |
| **Blur (ntu)** | 7.09 | 3.48 | 1.69 | 1.46 | 1.38 | 2.24 | 2.68 | 2.44 |
| **Color (Pt-Co)  465 nm** | 53 | 14 | 18 | 16 | 7 | 12 | 31 | 26 |
| **Color ( m⁻¹ )  436 nm** | 1.24 | 0.52 | 0.45 | 0.44 | 0.44 | 0.44 | 0.96 | 0.88 |
| **Color ( m⁻¹ )  525 nm** | 0.6 | 0.24 | 0.15 | 0.28 | 0.28 | 0.36 | 0.92 | 0.64 |
| **Color (m⁻¹ ) 620  nm** | 0.44 | 0.12 | 0.04 | 0.08 | 0.28 | 0.28 | 0.64 | 0.56 |
| ***Colorizations are based on Annex-5 Table 2 of the Surface Water Quality Regulation and the repealed (17.12.2022) Water Pollution Control Regulation Table-1: Quality Criteria According to the Classes of Inland Water Resources. Accordingly:** | | | | | | | | |
| **Water Quality Classes** |  | **I (Very good)** |  | **II (Good)** |  | **III (middle)** |  | **IV (Weak)** |
| **CLIMATIC/GEOGRAPHIC PARAMETER DATA** | | | | | | | | |
| **Year** | **2021** | | | | **2022** | | | |
| **Season** | **Winter** | **Spring** | **Summer** | **Autumn** | **Winter** | **Spring** | **Summer** | **Autumn** |
| **Current Air  Temperature ( ° C)** | 13 | 25.1 | 24.5 | 15.7 | 12.5 | 24.2 | 26.5 | 16.8 |
| **Wind** | 5 | 8 | 8 | 6 | 7 | 8 | 8 | 6 |
| **Water Level (Qualitative)**** | 3 | 2 | 1 | 2 | 4 | 3 | 2 | 1 |
| **Elevation** | 13 meters | | | | | | | |
| ****Water level was evaluated on a scale of 1 to 5.**** | | | | | | | | |

# APPENDIX-36: Microbiological Culture and Molecular Analysis Results of Çavuşköprü Stream (12Ç)

| **MICROBIOLOGICAL CULTURE ANALYSIS RESULTS*** | | | | | | | | |
| --- | --- | --- | --- | --- | --- | --- | --- | --- |
| **Year** | **2021** | | | | **2022** | | | |
| **Season** | **Winter** | **Spring** | **Summer** | **Autumn** | **Winter** | **Spring** | **Summer** | **Autumn** |
| **Total Coliform  (cfu/100ml)** | 754 | 7340 | 3220 | 5605 | 1072 | 4550 | 168000 | 4740 |
| **Fecal Coliform  (cfu/100ml)** | 34 | 160 | 37 | 120 | 36 | 140 | 97000 | 2820 |
| **Fecal Streptococcus (Enterococcus)  (cfu/100ml)** | 32 | 44 | 40 | 88 | 2 | 66 | 720 | 470 |
| ***Clostridium perfringens* (Vegetative+Sport)  (cfu/100ml)** | 0 | 27 | 1 | 2 | 6 | 15 | 350 | 140 |
| ***Clostridia* (Spores Only)  (cfu/100ml)** | 8 | 32 | 30 | 12 | 11 | 28 | 47 | 38 |
| ***Clostridia* (Vegetative+Sport)  (cfu/100ml)** | 24 | 362 | 420 | 120 | 38 | 248 | 5880 | 1170 |
| ***Pseudomonas aeruginosa*  (cfu/100ml)** | 0 | 0 | 0 | 0 | 0 | 0 | 0 | 0 |
| **36 ° C Total Germ Count  (cfu/1ml)** | 70 | 2040 | 280 | 1920 | 152 | 1970 | 116500 | 14530 |
| **22 ° C Total Germ Count  (cfu/1ml)** | 3040 | 5320 | 600 | 2860 | 1130 | 3320 | 278000 | 36500 |
| ***Colorizations are based on Annex-5 Table 2 of the Surface Water Quality Regulation and the repealed (17.12.2022) Water Pollution Control Regulation Table-1: Quality Criteria According to the Classes of Inland Water Resources. Accordingly:** | | | | | | | | |
| **Water Quality Classes** |  | **I (Very good)** |  | **II (Good)** |  | **III (middle)** |  | **IV (Weak)** |
| **MOLECULAR ANALYSIS RESULTS** | | | | | | | | |
| **Year** | **2021** | | | | **2022** | | | |
| **Season** | **Winter** | **Spring** | **Summer** | **Autumn** | **Winter** | **Spring** | **Summer** | **Autumn** |
| **BacUni  (log10 gc/100ml)** | 4.18 | 5.58 | 5.20 | 5.48 | 3.81 | 5.46 | 6.94 | 6.28 |
| **HF183  (log10 gc/100ml)** | 3.00 | 3.94 | 3.57 | 4.08 | 3.11 | 3.71 | 6.81 | 6.15 |
| **Bachum  (log10 gc/100ml)** | 2.95 | 3.96 | 3.41 | 4.18 | 2.85 | 3.89 | 6.64 | 5.89 |
| **BacCow  (log10 gc/100ml)** | 2.85 | 4.23 | 3.38 | 3.18 | 2.38 | 4.08 | 4.41 | 4.11 |
| **BacR  (log10 gc/100ml)** | 2.85 | 4.15 | 3.26 | 3.34 | 2.75 | 3.87 | 4.04 | 4.04 |
| **LOD: Limit of Detection** | | | | | | | | |

# APPENDIX-37: Physicochemical Analysis Results and Climatic/Geographical Parameter Data of İğneada Stream (13İ)

| **PHYSICAL-CHEMICAL ANALYSIS RESULTS*** | | | | | | | | |
| --- | --- | --- | --- | --- | --- | --- | --- | --- |
| **Year** | **2021** | | | | **2022** | | | |
| **Season** | **Winter** | **Spring** | **Summer** | **Autumn** | **Winter** | **Spring** | **Summer** | **Autumn** |
| **Water Temperature ( ° C)** | 8.6 | 20.5 | 22 | 9.3 | 9.7 | 20.6 | 24.6 | 12.7 |
| **pH** | 7.75 | 8.13 | 8.19 | 8.35 | 7.21 | 7.76 | 7.42 | 7.71 |
| **ORP** | -55.2 | -52.8 | -55.4 | -58.7 | -36.3 | -55.5 | -40 | -52.2 |
| **LDO (mg/l)** | 9.81 | 13.87 | 3.58 | 0.28 | 11.49 | 12.41 | 1.7 | 4.6 |
| **LDO %** | 83.6 | 153 | 41.2 | 2.4 | 99.1 | 100.2 | 20.3 | 58.6 |
| **EC ( µ s/cm)** | 187.7 | 326 | 391 | 393 | 310 | 289 | 316 | 310 |
| **TDS (ppm)** | 120 | 208.6 | 250.3 | 251.5 | 198.4 | 184.96 | 202.24 | 198.4 |
| **Total Alkalinity  (mg/l CaCO 3 )** | 60 | 120 | 151.5 | 193 | 116.5 | 145 | 152 | 148 |
| **Blur (ntu)** | 8.68 | 1.31 | 11.7 | 23.5 | 6.43 | 9.16 | 37.5 | 24.6 |
| **Color (Pt-Co)  465 nm** | 68 | 27 | 160 | 626 | 65 | 59 | 105 | 74 |
| **Color ( m⁻¹ )  436 nm** | 1.88 | 0.96 | 4.56 | 18.92 | 1.88 | 1.76 | 3.8 | 2.04 |
| **Color ( m⁻¹ )  525 nm** | 0.96 | 0.44 | 2.2 | 12.56 | 0.92 | 1.24 | 1.76 | 1.36 |
| **Color (m⁻¹ ) 620  nm** | 0.84 | 0.2 | 1.28 | 8.84 | 0.48 | 0.88 | 1.24 | 0.98 |
| ***Colorizations are based on Annex-5 Table 2 of the Surface Water Quality Regulation and the repealed (17.12.2022) Water Pollution Control Regulation Table-1: Quality Criteria According to the Classes of Inland Water Resources. Accordingly:** | | | | | | | | |
| **Water Quality Classes** |  | **I (Very good)** |  | **II (Good)** |  | **III (middle)** |  | **IV (Weak)** |
| **CLIMATIC/GEOGRAPHIC PARAMETER DATA** | | | | | | | | |
| **Year** | **2021** | | | | **2022** | | | |
| **Season** | **Winter** | **Spring** | **Summer** | **Autumn** | **Winter** | **Spring** | **Summer** | **Autumn** |
| **Current Air  Temperature ( ° C)** | 13 | 24.5 | 25.2 | 12.9 | 15.9 | 23.8 | 26.5 | 16.4 |
| **Wind** | 5 | 8 | 10 | 9 | 8 | 10 | 8 | 10 |
| **Water Level (Qualitative)**** | 4 | 3 | 2 | 1 | 5 | 4 | 2 | 1 |
| **Elevation** | 13 meters | | | | | | | |
| ****Water level was evaluated on a scale of 1 to 5.**** | | | | | | | | |

# APPENDIX-38: Microbiological Culture and Molecular Analysis Results of İğneada Stream (13İ)

| **MICROBIOLOGICAL CULTURE ANALYSIS RESULTS*** | | | | | | | | |
| --- | --- | --- | --- | --- | --- | --- | --- | --- |
| **Year** | **2021** | | | | **2022** | | | |
| **Season** | **Winter** | **Spring** | **Summer** | **Autumn** | **Winter** | **Spring** | **Summer** | **Autumn** |
| **Total Coliform  (cfu/100ml)** | 900 | 2000 | 3670 | 5500 | 3790 | 4320 | 820 | 540 |
| **Fecal Coliform  (cfu/100ml)** | 60 | 300 | 430 | 1900 | 750 | 1210 | 112 | 88 |
| **Fecal Streptococcus (Enterococcus)  (cfu/100ml)** | 8 | 6 | 190 | 45 | 38 | 115 | 210 | 117 |
| ***Clostridium perfringens* (Vegetative+Sport)  (cfu/100ml)** | 1 | 16 | 12 | 19 | 24 | 14 | 4 | 2 |
| ***Clostridia* (Spores Only)  (cfu/100ml)** | 12 | 175 | 330 | 450 | 24 | 226 | 122 | 91 |
| ***Clostridia* (Vegetative+Sport)  (cfu/100ml)** | 28 | 674 | 4200 | 6300 | 112 | 850 | 4850 | 3320 |
| ***Pseudomonas aeruginosa*  (cfu/100ml)** | 0 | 0 | 0 | 0 | 0 | 1 | 0 | 0 |
| **36 ° C Total Germ Count  (cfu/1ml)** | 83 | 420 | 900 | 9040 | 396 | 550 | 2680 | 410 |
| **22 ° C Total Germ Count  (cfu/1ml)** | 3760 | 1580 | 2040 | 17400 | 1680 | 3780 | 3760 | 1760 |
| ***Colorizations are based on Annex-5 Table 2 of the Surface Water Quality Regulation and the repealed (17.12.2022) Water Pollution Control Regulation Table-1: Quality Criteria According to the Classes of Inland Water Resources. Accordingly:** | | | | | | | | |
| **Water Quality Classes** |  | **I (Very good)** |  | **II (Good)** |  | **III (middle)** |  | **IV (Weak)** |
| **MOLECULAR ANALYSIS RESULTS** | | | | | | | | |
| **Year** | **2021** | | | | **2022** | | | |
| **Season** | **Winter** | **Spring** | **Summer** | **Autumn** | **Winter** | **Spring** | **Summer** | **Autumn** |
| **BacUni  (log10 gc/100ml)** | 4.36 | 5.11 | 5.53 | 5.99 | 4.26 | 5.51 | 5.18 | 4.58 |
| **HF183  (log10 gc/100ml)** | 3.00 | 4.26 | 5.04 | 5.62 | 3.45 | 5.45 | 4.36 | 3.51 |
| **Bachum  (log10 gc/100ml)** | 2.90 | 4.23 | 5.00 | 5.61 | 3.87 | 5.38 | 4.73 | 3.43 |
| **BacCow  (log10 gc/100ml)** | 2.90 | 3.20 | 3.54 | 3.18 | 2.67 | 3.79 | 2.92 | 3.32 |
| **BacR  (log10 gc/100ml)** | 2.90 | 3.45 | 3.28 | 3.08 | LOD | 4.04 | 3.15 | 3.45 |
| **LOD: Limit of Detection** | | | | | | | | |

# APPENDIX-39: Physicochemical Analysis Results and Climatic/Geographical Parameter Data of Altın Dere (14A)

| **PHYSICAL-CHEMICAL ANALYSIS RESULTS*** | | | | | | | | |
| --- | --- | --- | --- | --- | --- | --- | --- | --- |
| **Year** | **2021** | | | | **2022** | | | |
| **Season** | **Winter** | **Spring** | **Summer** | **Autumn** | **Winter** | **Spring** | **Summer** | **Autumn** |
| **Water Temperature ( ° C)** | 8 | 20.2 | 21.8 | 9.9 | 9.4 | 20.2 | 25.8 | 12.1 |
| **pH** | 7.78 | 8.35 | 8.56 | 8.67 | 7.23 | 7.41 | 7.61 | 7.97 |
| **ORP** | -56.6 | -62.6 | -73.4 | -75.9 | -37.5 | -44.3 | -51 | -64.3 |
| **LDO (mg/l)** | 11.7 | 10.78 | 5.16 | 6.46 | 11.44 | 10,11 | 7.74 | 9.22 |
| **LDO %** | 98.1 | 119.5 | 59.4 | 58.9 | 97.7 | 100.2 | 96.9 | 99.3 |
| **EC ( µ s/cm)** | 164.4 | 269 | 305 | 308 | 225 | 278 | 288 | 304 |
| **TDS (ppm)** | 105 | 172.2 | 195.2 | 197.1 | 144 | 177.92 | 184.32 | 194.56 |
| **Total Alkalinity  (mg/l CaCO 3 )** | 49.5 | 93.5 | 88.5 | 106.5 | 78.5 | 86.5 | 93 | 87 |
| **Blur (ntu)** | 1.96 | 0.73 | 0.97 | 5.62 | 1.38 | 0.88 | 1.43 | 2.2 |
| **Color (Pt-Co)  465 nm** | 14 | 20 | 15 | 25 | 11 | 16 | 29 | 27 |
| **Color ( m⁻¹ )  436 nm** | 0.4 | 0.56 | 0.6 | 0.68 | 0.36 | 0.48 | 0.64 | 0.64 |
| **Color ( m⁻¹ )  525 nm** | 0.16 | 0.28 | 0.28 | 0.4 | 0.28 | 0.32 | 0.48 | 0.56 |
| **Color (m⁻¹ ) 620  nm** | 0.12 | 0.16 | 0.08 | 0.32 | 0.16 | 0.2 | 0.36 | 0.32 |
| ***Colorizations are based on Annex-5 Table 2 of the Surface Water Quality Regulation and the repealed (17.12.2022) Water Pollution Control Regulation Table-1: Quality Criteria According to the Classes of Inland Water Resources. Accordingly:** | | | | | | | | |
| **Water Quality Classes** |  | **I (Very good)** |  | **II (Good)** |  | **III (middle)** |  | **IV (Weak)** |
| **CLIMATIC/GEOGRAPHIC PARAMETER DATA** | | | | | | | | |
| **Year** | **2021** | | | | **2022** | | | |
| **Season** | **Winter** | **Spring** | **Summer** | **Autumn** | **Winter** | **Spring** | **Summer** | **Autumn** |
| **Current Air  Temperature ( ° C)** | 11 | 25.4 | 28.8 | 15.3 | 14.5 | 23.2 | 26.9 | 16.5 |
| **Wind** | 4 | 9 | 10 | 8 | 7 | 8 | 8 | 8 |
| **Water Level (Qualitative)**** | 3 | 2 | 1 | 2 | 3 | 3 | 2 | 1 |
| **Elevation** | 15 meters | | | | | | | |
| ****Water level was evaluated on a scale of 1 to 5.**** | | | | | | | | |

# APPENDIX-40: Microbiological Culture and Molecular Analysis Results of Altın Dere (14A)

| **MICROBIOLOGICAL CULTURE ANALYSIS RESULTS*** | | | | | | | | |
| --- | --- | --- | --- | --- | --- | --- | --- | --- |
| **Year** | **2021** | | | | **2022** | | | |
| **Season** | **Winter** | **Spring** | **Summer** | **Autumn** | **Winter** | **Spring** | **Summer** | **Autumn** |
| **Total Coliform  (cfu/100ml)** | 438 | 6280 | 9250 | 1789 | 1358 | 3210 | 435 | 216 |
| **Fecal Coliform  (cfu/100ml)** | 16 | 280 | 72 | 94 | 152 | 140 | 110 | 24 |
| **Fecal Streptococcus (Enterococcus)  (cfu/100ml)** | 10 | 74 | 70 | 16 | 8 | 55 | 840 | 370 |
| ***Clostridium perfringens* (Vegetative+Sport)  (cfu/100ml)** | 2 | 9 | 1 | 6 | 0 | 2 | 46 | 14 |
| ***Clostridia* (Spores Only)  (cfu/100ml)** | 4 | 12 | 2020 | 27 | 21 | 27 | 167 | 66 |
| ***Clostridia* (Vegetative+Sport)  (cfu/100ml)** | 24 | 60 | 4500 | 390 | 27 | 210 | 4850 | 1020 |
| ***Pseudomonas aeruginosa*  (cfu/100ml)** | 0 | 0 | 95 | 0 | 0 | 0 | 0 | 1 |
| **36 ° C Total Germ Count  (cfu/1ml)** | 93 | 600 | 3140 | 1620 | 254 | 710 | 3800 | 990 |
| **22 ° C Total Germ Count  (cfu/1ml)** | 1980 | 5720 | 5400 | 3280 | 2040 | 3360 | 4540 | 3450 |
| ***Colorizations are based on Annex-5 Table 2 of the Surface Water Quality Regulation and the repealed (17.12.2022) Water Pollution Control Regulation Table-1: Quality Criteria According to the Classes of Inland Water Resources. Accordingly:** | | | | | | | | |
| **Water Quality Classes** |  | **I (Very good)** |  | **II (Good)** |  | **III (middle)** |  | **IV (Weak)** |
| **MOLECULAR ANALYSIS RESULTS** | | | | | | | | |
| **Year** | **2021** | | | | **2022** | | | |
| **Season** | **Winter** | **Spring** | **Summer** | **Autumn** | **Winter** | **Spring** | **Summer** | **Autumn** |
| **BacUni  (log10 gc/100ml)** | 3.96 | 5.71 | 5.83 | 4.99 | 4.20 | 5.48 | 5.53 | 4.58 |
| **HF183  (log10 gc/100ml)** | 2.57 | 4.40 | 4.04 | 3.52 | 2.96 | 3.89 | 5.08 | 2.38 |
| **Bachum  (log10 gc/100ml)** | 2.58 | 4.53 | 4.15 | 3.38 | 2.97 | 4.08 | 4.94 | LOD |
| **BacCow  (log10 gc/100ml)** | 2.90 | 4.48 | 5.04 | 3.58 | 2.86 | 3.77 | 5.34 | LOD |
| **BacR  (log10 gc/100ml)** | 2.73 | 4.53 | 4.84 | 3.45 | 2.49 | 3.36 | 5.18 | LOD |
| **LOD: Limit of Detection** | | | | | | | | |

# APPENDIX-41: Physicochemical Analysis Results and Climatic/Geographical Parameter Data of Erikli Lake (15E)

| **PHYSICAL-CHEMICAL ANALYSIS RESULTS*** | | | | | | | | |
| --- | --- | --- | --- | --- | --- | --- | --- | --- |
| **Year** | **2021** | | | | **2022** | | | |
| **Season** | **Winter** | **Spring** | **Summer** | **Autumn** | **Winter** | **Spring** | **Summer** | **Autumn** |
| **Water Temperature ( ° C)** | 9.4 | 24.7 | 26.6 | 11.2 | 11.9 | 21.3 | 27.1 | 14.7 |
| **pH** | 7.67 | 8.01 | 8.38 | 8.27 | 7.58 | 7.89 | 9.54 | 8.91 |
| **ORP** | -51.1 | -46.6 | -65.7 | -56.8 | -57.1 | -61.6 | -162.1 | -100.1 |
| **LDO (mg/l)** | 10.57 | 10.51 | 9.39 | 14.35 | 12.76 | 11,12 | 14.2 | 15.1 |
| **LDO %** | 92.7 | 125 | 117.3 | 130.5 | 116.7 | 111.1 | 179.3 | 181.2 |
| **EC ( µ s/cm)** | 2780 | 4230 | 16980 | 11680 | 6850 | 11440 | 4930 | 5120 |
| **TDS (ppm)** | 1779 | 2707.2 | 10867 | 7475.2 | 4384 | 7321.6 | 3155.2 | 3276.8 |
| **Total Alkalinity  (mg/l CaCO 3 )** | 69.5 | 162 | 166.5 | 299 | 123.5 | 175.5 | 137 | 256.5 |
| **Blur (ntu)** | 9.19 | 2.46 | 5.7 | 4.81 | 5.81 | 4.42 | 15.8 | 9.98 |
| **Color (Pt-Co)  465 nm** | 68 | 58 | 75 | 148 | 63 | 96 | 46 | 39 |
| **Color ( m⁻¹ )  436 nm** | 2.2 | 2.04 | 2.28 | 4.04 | 2.08 | 3.12 | 1.08 | 1.04 |
| **Color ( m⁻¹ )  525 nm** | 1.04 | 1 | 1.4 | 2.56 | 1,2 | 1.88 | 0.72 | 0.92 |
| **Color (m⁻¹ ) 620  nm** | 0.68 | 0.68 | 1 | 1.92 | 0.68 | 1.24 | 0.32 | 0.48 |
| ***Colorizations are based on Annex-5 Table 2 of the Surface Water Quality Regulation and the repealed (17.12.2022) Water Pollution Control Regulation Table-1: Quality Criteria According to the Classes of Inland Water Resources. Accordingly:** | | | | | | | | |
| **Water Quality Classes** |  | **I (Very good)** |  | **II (Good)** |  | **III (middle)** |  | **IV (Weak)** |
| **CLIMATIC/GEOGRAPHIC PARAMETER DATA** | | | | | | | | |
| **Year** | **2021** | | | | **2022** | | | |
| **Season** | **Winter** | **Spring** | **Summer** | **Autumn** | **Winter** | **Spring** | **Summer** | **Autumn** |
| **Current Air  Temperature ( ° C)** | 6 | 19.7 | 26.1 | 14.1 | 13.9 | 23.3 | 28.5 | 17.6 |
| **Wind** | 3 | 15 | 22 | 21 | 20 | 18 | 13 | 21 |
| **Water Level (Qualitative)**** | 3 | 3 | 2 | 2 | 4 | 4 | 3 | 2 |
| **Elevation** | 0 meters | | | | | | | |
| ****Water level was evaluated on a scale of 1 to 5.**** | | | | | | | | |

# APPENDIX-42: Microbiological Culture and Molecular Analysis Results of Erikli Lake (15E)

| **MICROBIOLOGICAL CULTURE ANALYSIS RESULTS*** | | | | | | | | |
| --- | --- | --- | --- | --- | --- | --- | --- | --- |
| **Year** | **2021** | | | | **2022** | | | |
| **Season** | **Winter** | **Spring** | **Summer** | **Autumn** | **Winter** | **Spring** | **Summer** | **Autumn** |
| **Total Coliform  (cfu/100ml)** | 1440 | 43460 | 5400 | 401 | 634 | 1140 | 1210 | 340 |
| **Fecal Coliform  (cfu/100ml)** | 20 | 2200 | 330 | 65 | 22 | 130 | 195 | 46 |
| **Fecal Streptococcus (Enterococcus)  (cfu/100ml)** | 14 | 240 | 55 | 8 | 2 | 11 | 42 | 13 |
| ***Clostridium perfringens* (Vegetative+Sport)  (cfu/100ml)** | 4 | 58 | 6 | 0 | 18 | 18 | 4 | 0 |
| ***Clostridia* (Spores Only)  (cfu/100ml)** | 34 | 1440 | 700 | 125 | 74 | 220 | 65 | 26 |
| ***Clostridia* (Vegetative+Sport)  (cfu/100ml)** | 196 | 5280 | 5400 | 3250 | 980 | 4110 | 7270 | 2210 |
| ***Pseudomonas aeruginosa*  (cfu/100ml)** | 0 | 52 | 0 | 0 | 0 | 0 | 0 | 0 |
| **36 ° C Total Germ Count  (cfu/1ml)** | 468 | 14400 | 800 | 410 | 232 | 880 | 880 | 350 |
| **22 ° C Total Germ Count  (cfu/1ml)** | 2540 | 15800 | 9000 | 920 | 1420 | 3150 | 1560 | 810 |
| ***Colorizations are based on Annex-5 Table 2 of the Surface Water Quality Regulation and the repealed (17.12.2022) Water Pollution Control Regulation Table-1: Quality Criteria According to the Classes of Inland Water Resources. Accordingly:** | | | | | | | | |
| **Water Quality Classes** |  | **I (Very good)** |  | **II (Good)** |  | **III (middle)** |  | **IV (Weak)** |
| **MOLECULAR ANALYSIS RESULTS** | | | | | | | | |
| **Year** | **2021** | | | | **2022** | | | |
| **Season** | **Winter** | **Spring** | **Summer** | **Autumn** | **Winter** | **Spring** | **Summer** | **Autumn** |
| **BacUni  (log10 gc/100ml)** | 4.38 | 6.70 | 5.72 | 3.98 | 4.04 | 6.15 | 6.04 | 4.04 |
| **HF183  (log10 gc/100ml)** | 3.18 | 5.66 | 4.74 | 3.36 | 3.08 | 5.05 | 5.18 | 3.69 |
| **Bachum  (log10 gc/100ml)** | 3.15 | 5.59 | 4.76 | 3.30 | 3.00 | 4.88 | 5.36 | 3.82 |
| **BacCow  (log10 gc/100ml)** | 3.11 | 4.71 | 4.60 | 3.04 | 2.97 | 4.64 | 4.32 | 2.80 |
| **BacR  (log10 gc/100ml)** | 3.18 | 4.70 | 4.45 | 3.15 | 3.36 | 4.08 | 3.92 | 2.73 |
| **LOD: Limit of Detection** | | | | | | | | |

# APPENDIX-43: Physicochemical Analysis Results and Climatic/Geographical Parameter Data for Efendi Creek – National Park Entrance (16E)

| **PHYSICAL-CHEMICAL ANALYSIS RESULTS*** | | | | | | | | |
| --- | --- | --- | --- | --- | --- | --- | --- | --- |
| **Year** | **2021** | | | | **2022** | | | |
| **Season** | **Winter** | **Spring** | **Summer** | **Autumn** | **Winter** | **Spring** | **Summer** | **Autumn** |
| **Water Temperature ( ° C)** | 7.5 | 15.8 | 21.8 | 9.2 | 7.6 | 18.3 | 21.2 | 14.1 |
| **pH** | 7.82 | 8.19 | 8.29 | 8.38 | 7.48 | 7.88 | 7.55 | 7.91 |
| **ORP** | -58.8 | -54.3 | -60.3 | -61.4 | -51.2 | -61.2 | -47.4 | -63.6 |
| **LDO (mg/l)** | 11.2 | 6.89 | 5.63 | 0.41 | 11.66 | 7.96 | 0.49 | 6.24 |
| **LDO %** | 93.5 | 72.2 | 64.4 | 3.5 | 96.5 | 84.8 | 5,6 | 77.6 |
| **EC ( µ s/cm)** | 207.4 | 377 | 362 | 321 | 336 | 354 | 334 | 313 |
| **TDS (ppm)** | 133 | 241.3 | 231.7 | 205.44 | 215 | 226.56 | 213.76 | 200.32 |
| **Total Alkalinity  (mg/l CaCO 3 )** | 77 | 145.5 | 144 | 158 | 141.5 | 140.5 | 160 | 151.5 |
| **Blur (ntu)** | 4.61 | 2.02 | 1.05 | 3.42 | 2.62 | 2.51 | 11.3 | 5.75 |
| **Color (Pt-Co)  465 nm** | 41 | 72 | 13 | 165 | 40 | 45 | 45 | 39 |
| **Color ( m⁻¹ )  436 nm** | 1,2 | 1.08 | 0.48 | 5.04 | 1,2 | 1.16 | 1,2 | 0.96 |
| **Color ( m⁻¹ )  525 nm** | 1 | 0.6 | 0.16 | 2.64 | 0.84 | 0.76 | 0.64 | 0.88 |
| **Color (m⁻¹ ) 620  nm** | 0.76 | 0.44 | 0 | 1.8 | 0.52 | 0.44 | 0.48 | 0.48 |
| ***Colorizations are based on Annex-5 Table 2 of the Surface Water Quality Regulation and the repealed (17.12.2022) Water Pollution Control Regulation Table-1: Quality Criteria According to the Classes of Inland Water Resources. Accordingly:** | | | | | | | | |
| **Water Quality Classes** |  | **I (Very good)** |  | **II (Good)** |  | **III (middle)** |  | **IV (Weak)** |
| **CLIMATIC/GEOGRAPHIC PARAMETER DATA** | | | | | | | | |
| **Year** | **2021** | | | | **2022** | | | |
| **Season** | **Winter** | **Spring** | **Summer** | **Autumn** | **Winter** | **Spring** | **Summer** | **Autumn** |
| **Current Air  Temperature ( ° C)** | 8 | 22.5 | 26 | 15.9 | 14.9 | 22.9 | 29.1 | 17.5 |
| **Wind** | 3 | 9 | 12 | 4 | 8 | 6 | 4 | 8 |
| **Water Level (Qualitative)**** | 4 | 3 | 2 | 1 | 4 | 3 | 2 | 1 |
| **Elevation** | 20 meters | | | | | | | |
| ****Water level was evaluated on a scale of 1 to 5.**** | | | | | | | | |

# APPENDIX-44: Microbiological Culture and Molecular Analysis Results of Efendi Creek – National Park Entrance (16E)

| **MICROBIOLOGICAL CULTURE ANALYSIS RESULTS*** | | | | | | | | |
| --- | --- | --- | --- | --- | --- | --- | --- | --- |
| **Year** | **2021** | | | | **2022** | | | |
| **Season** | **Winter** | **Spring** | **Summer** | **Autumn** | **Winter** | **Spring** | **Summer** | **Autumn** |
| **Total Coliform  (cfu/100ml)** | 2340 | 5960 | 12830 | 434 | 1708 | 1850 | 5380 | 1120 |
| **Fecal Coliform  (cfu/100ml)** | 88 | 120 | 95 | 13 | 114 | 122 | 275 | 156 |
| **Fecal Streptococcus (Enterococcus)  (cfu/100ml)** | 12 | 28 | 210 | 5 | 8 | 33 | 560 | 274 |
| ***Clostridium perfringens* (Vegetative+Sport)  (cfu/100ml)** | 2 | 3 | 3 | 0 | 0 | 1 | 1 | 1 |
| ***Clostridia* (Spores Only)  (cfu/100ml)** | 4 | 18 | 120 | 42 | 13 | 27 | 22 | 14 |
| ***Clostridia* (Vegetative+Sport)  (cfu/100ml)** | 6 | 84 | 2500 | 120 | 126 | 214 | 630 | 770 |
| ***Pseudomonas aeruginosa*  (cfu/100ml)** | 0 | 0 | 0 | 0 | 0 | 0 | 0 | 0 |
| **36 ° C Total Germ Count  (cfu/1ml)** | 128 | 120 | 1520 | 500 | 302 | 470 | 620 | 144 |
| **22 ° C Total Germ Count  (cfu/1ml)** | 9200 | 2800 | 6600 | 1830 | 4440 | 3590 | 850 | 540 |
| ***Colorizations are based on Annex-5 Table 2 of the Surface Water Quality Regulation and the repealed (17.12.2022) Water Pollution Control Regulation Table-1: Quality Criteria According to the Classes of Inland Water Resources. Accordingly:** | | | | | | | | |
| **Water Quality Classes** |  | **I (Very good)** |  | **II (Good)** |  | **III (middle)** |  | **IV (Weak)** |
| **MOLECULAR ANALYSIS RESULTS** | | | | | | | | |
| **Year** | **2021** | | | | **2022** | | | |
| **Season** | **Winter** | **Spring** | **Summer** | **Autumn** | **Winter** | **Spring** | **Summer** | **Autumn** |
| **BacUni  (log10 gc/100ml)** | 4.59 | 5.64 | 5.89 | 4.32 | 4.15 | 5.30 | 5.38 | 4.53 |
| **HF183  (log10 gc/100ml)** | 3.26 | 3.79 | 3.95 | 2.53 | 3.53 | 3.74 | 4.11 | 3.46 |
| **Bachum  (log10 gc/100ml)** | 3.18 | 3.73 | 3.93 | LOD | 3.36 | 3.11 | 4.04 | 3.18 |
| **BacCow  (log10 gc/100ml)** | 3.08 | 3.38 | 4.26 | LOD | 2.94 | 2.97 | 4.52 | 3.15 |
| **BacR  (log10 gc/100ml)** | 3.00 | 3.53 | 4.11 | 2.38 | 2.65 | LOD | 4.38 | 3.00 |
| **LOD: Limit of Detection** | | | | | | | | |

# APPENDIX-45: Physicochemical Analysis Results and Climatic/Geographical Parameter Data of Efendi Creek – Confluence Point of the Springs (17E)

| **PHYSICAL-CHEMICAL ANALYSIS RESULTS*** | | | | | | | | |
| --- | --- | --- | --- | --- | --- | --- | --- | --- |
| **Year** | **2021** | | | | **2022** | | | |
| **Season** | **Winter** | **Spring** | **Summer** | **Autumn** | **Winter** | **Spring** | **Summer** | **Autumn** |
| **Water Temperature ( ° C)** | 8 | 16 | 19.5 | 10.1 | 9.2 | 18.1 | 20.9 | 14.3 |
| **pH** | 7.78 | 8.31 | 8.13 | 8.35 | 7.63 | 7.95 | 7.36 | 7.88 |
| **ORP** | -56.7 | -59.6 | -51.6 | -60.5 | -60 | -62.6 | -36.8 | -62.1 |
| **LDO (mg/l)** | 11.01 | 7.77 | 2.6 | 4.75 | 11.02 | 9.5 | 3.55 | 7.61 |
| **LDO %** | 93.6 | 79.8 | 28.3 | 43.9 | 94.2 | 90.1 | 40.4 | 75.9 |
| **EC ( µ s/cm)** | 259 | 423 | 494 | 483 | 368 | 426 | 421 | 389 |
| **TDS (ppm)** | 166 | 270.7 | 316.7 | 309.1 | 235.5 | 272.64 | 269.44 | 248.96 |
| **Total Alkalinity  (mg/l CaCO 3 )** | 104.5 | 179.5 | 212.5 | 228.5 | 169 | 200.5 | 212 | 201.5 |
| **Blur (ntu)** | 2.8 | 0.44 | 0.91 | 0.86 | 1.34 | 0.92 | 1.91 | 1.41 |
| **Color (Pt-Co)  465 nm** | 25 | 3 | 5 | 29 | 12 | 10 | 13 | 9 |
| **Color ( m⁻¹ )  436 nm** | 0.4 | 0.12 | 0.24 | 0.44 | 0.2 | 0.16 | 0.28 | 0.16 |
| **Color ( m⁻¹ )  525 nm** | 0.16 | 0.4 | 0.04 | 0.28 | 0.16 | 0.12 | 0.12 | 0.12 |
| **Color (m⁻¹ ) 620  nm** | 0.04 | 0 | 0 | 0.12 | 0.04 | 0.08 | 0.04 | 0.12 |
| ***Colorizations are based on Annex-5 Table 2 of the Surface Water Quality Regulation and the repealed (17.12.2022) Water Pollution Control Regulation Table-1: Quality Criteria According to the Classes of Inland Water Resources. Accordingly:** | | | | | | | | |
| **Water Quality Classes** |  | **I (Very good)** |  | **II (Good)** |  | **III (middle)** |  | **IV (Weak)** |
| **CLIMATIC/GEOGRAPHIC PARAMETER DATA** | | | | | | | | |
| **Year** | **2021** | | | | **2022** | | | |
| **Season** | **Winter** | **Spring** | **Summer** | **Autumn** | **Winter** | **Spring** | **Summer** | **Autumn** |
| **Current Air  Temperature ( ° C)** | 10 | 23.6 | 24.5 | 14.9 | 15.2 | 22.1 | 28.1 | 17.9 |
| **Wind** | 3 | 9 | 10 | 4 | 8 | 10 | 7 | 9 |
| **Water Level (Qualitative)**** | 3 | 2 | 1 | 2 | 4 | 3 | 2 | 1 |
| **Elevation** | 43 meters | | | | | | | |
| ****Water level was evaluated on a scale of 1 to 5.**** | | | | | | | | |

# APPENDIX-46: Microbiological Culture and Molecular Analysis Results of Efendi Creek – Confluence Point of Springs (17E)

| **MICROBIOLOGICAL CULTURE ANALYSIS RESULTS*** | | | | | | | | |
| --- | --- | --- | --- | --- | --- | --- | --- | --- |
| **Year** | **2021** | | | | **2022** | | | |
| **Season** | **Winter** | **Spring** | **Summer** | **Autumn** | **Winter** | **Spring** | **Summer** | **Autumn** |
| **Total Coliform  (cfu/100ml)** | 716 | 8500 | 10285 | 8225 | 146 | 910 | 3788 | 440 |
| **Fecal Coliform  (cfu/100ml)** | 14 | 100 | 100 | 57 | 26 | 55 | 112 | 65 |
| **Fecal Streptococcus (Enterococcus)  (cfu/100ml)** | 4 | 30 | 410 | 19 | 2 | 14 | 142 | 22 |
| ***Clostridium perfringens* (Vegetative+Sport)  (cfu/100ml)** | 0 | 2 | 4 | 0 | 0 | 0 | 1 | 0 |
| ***Clostridia* (Spores Only)  (cfu/100ml)** | 4 | 14 | 18 | 7 | 6 | 21 | 49 | 34 |
| ***Clostridia* (Vegetative+Sport)  (cfu/100ml)** | 12 | 23 | 160 | 33 | 19 | 117 | 2160 | 440 |
| ***Pseudomonas aeruginosa*  (cfu/100ml)** | 0 | 0 | 0 | 0 | 0 | 0 | 0 | 0 |
| **36 ° C Total Germ Count  (cfu/1ml)** | 28 | 540 | 700 | 740 | 5 | 144 | 680 | 71 |
| **22 ° C Total Germ Count  (cfu/1ml)** | 1140 | 2360 | 1080 | 5160 | 912 | 1250 | 820 | 930 |
| ***Colorizations are based on Annex-5 Table 2 of the Surface Water Quality Regulation and the repealed (17.12.2022) Water Pollution Control Regulation Table-1: Quality Criteria According to the Classes of Inland Water Resources. Accordingly:** | | | | | | | | |
| **Water Quality Classes** |  | **I (Very good)** |  | **II (Good)** |  | **III (middle)** |  | **IV (Weak)** |
| **MOLECULAR ANALYSIS RESULTS** | | | | | | | | |
| **Year** | **2021** | | | | **2022** | | | |
| **Season** | **Winter** | **Spring** | **Summer** | **Autumn** | **Winter** | **Spring** | **Summer** | **Autumn** |
| **BacUni  (log10 gc/100ml)** | 3.98 | 5.66 | 5.70 | 5.53 | 3.49 | 4.94 | 5.20 | 4.48 |
| **HF183  (log10 gc/100ml)** | 2.40 | 3.80 | 3.87 | 3.63 | 2.96 | 3.56 | 3.85 | LOD |
| **Bachum  (log10 gc/100ml)** | 2.32 | 3.85 | 3.79 | 3.83 | 2.89 | 2.94 | 3.64 | LOD |
| **BacCow  (log10 gc/100ml)** | LOD | 3.72 | 3.84 | 3.59 | LOD | 3.08 | 3.59 | LOD |
| **BacR  (log10 gc/100ml)** | LOD | 3.58 | 3.85 | 3.56 | 2.18 | LOD | 3.32 | LOD |
| **LOD: Limit of Detection** | | | | | | | | |

# APPENDIX-47: STANDARD CURVES USED AS REFERENCE IN QPCR STUDIES

|  | |
| --- | --- |
|  |  |
